# Supplementary material for: Aripiprazole as a Candidate Treatment of COVID-19 Identified Through Genomic Analysis
Source: PubMed Central journal article supplement (PMC7982825; doi:10.3389/fphar.2021.646701), 2021-03-02
Supplement: datasheet1.pdf [file datasheet1.pdf]

**Table S1. Differential expression between COVID19 patients and controls**

| Gene Symbol | Base Mean Control | Base Mean COVID-19 patients | P adj   | Gene Symbol | Base Mean Control | Base Mean COVID-19 patients | P adj |
|-------------|-------------------|-----------------------------|---------|-------------|-------------------|-----------------------------|-------|
| CLC         | 67.869            | 0.915                       | 7.8e-23 | AL139274.1  | 1.784             | 0.15                        | 0.008 |
| PHRF1       | 0                 | 7.788                       | 9.4e-21 | FAM105A     | 22.103            | 37.542                      | 0.008 |
| ADAMTS2     | 0.423             | 67.785                      | 1.6e-20 | CTSL        | 6.65              | 16.611                      | 0.008 |
| HLA-A       | 1.725             | 818.39                      | 1.4e-19 | ASL         | 14.48             | 18.009                      | 0.008 |
| C2          | 0.213             | 1.92                        | 8.6e-19 | RHEB        | 25.075            | 36.029                      | 0.009 |
| MAML1       | 12.378            | 6.514                       | 1.5e-18 | SBSPON      | 2.487             | 0.789                       | 0.009 |
| RPS9        | 11.475            | 169.524                     | 1.6e-18 | MTHFD2      | 14.603            | 20.313                      | 0.009 |
| CROCC2      | 2.687             | 0.049                       | 3.0e-18 | EDNRB       | 0.016             | 0.457                       | 0.009 |
| IGHV1-2     | 1.579             | 117.506                     | 1.0e-17 | GALNT2      | 16.885            | 29.859                      | 0.009 |
| IKZF2       | 15.732            | 3.234                       | 1.0e-17 | CENPA       | 0.627             | 1.254                       | 0.009 |
| TPX2        | 0.594             | 2.767                       | 2.3e-16 | COPA        | 54.259            | 69.981                      | 0.009 |
| RASSF7      | 1.42              | 4.541                       | 8.6e-16 | TRBV29-1    | 102.253           | 17.957                      | 0.009 |
| RPP21       | 0.055             | 8.764                       | 2.9e-14 | MRPS7       | 16.492            | 22.795                      | 0.009 |
| IGLV7-46    | 2.523             | 53.729                      | 4.1e-13 | SLC9A7P1    | 1.1               | 3.131                       | 0.009 |
| HCG4P5      | 0                 | 5.889                       | 5.0e-13 | CHRNE       | 3.069             | 0.765                       | 0.009 |
| CDKN1C      | 7.194             | 0.494                       | 5.2e-13 | TPM2        | 20.948            | 5.583                       | 0.009 |
| CD180       | 0.837             | 2.04                        | 1.2e-12 | MTND1P23    | 98.483            | 26.206                      | 0.009 |
| HCG4P5      | 0.029             | 26.521                      | 2.8e-12 | UBTD1       | 3.716             | 6.566                       | 0.009 |
| SLC25A29    | 56.283            | 17.038                      | 3.0e-12 | KCNJ3       | 0.576             | 0.051                       | 0.009 |
| MYBL2       | 0.862             | 8.552                       | 3.3e-12 | RAB39A      | 1.509             | 2.592                       | 0.009 |
| DDX39B      | 0                 | 2.504                       | 3.3e-12 | TMEM181     | 25.547            | 9.794                       | 0.009 |
| B3GALT4     | 3.077             | 0                           | 3.4e-12 | GLRX        | 64.442            | 136.617                     | 0.009 |
| CHST13      | 1.027             | 5.25                        | 5.6e-12 | TPPP        | 1.316             | 0.234                       | 0.009 |
| FN1         | 2.547             | 17.781                      | 5.8e-12 | DNASE1L1    | 16.687            | 24.676                      | 0.009 |
| DLGAP5      | 0.248             | 1.618                       | 1.0e-11 | SLC35A1     | 14.871            | 21.685                      | 0.009 |
| CES1        | 0.567             | 30.254                      | 2.9e-11 | IGHJ2       | 1.447             | 107.905                     | 0.009 |
| SIGLEC17P   | 12.732            | 1.28                        | 9.7e-11 | AC073850.1  | 2.424             | 16.142                      | 0.009 |
| CDC25A      | 0.069             | 0.837                       | 1.0e-10 | RNF135      | 24.005            | 33.048                      | 0.009 |
| AC008695.1  | 0                 | 0.494                       | 1.3e-10 | SFTPD       | 0.904             | 0.098                       | 0.009 |
| IGHG1       | 12.891            | 2226.887                    | 1.8e-10 | DBI         | 99.497            | 136.81                      | 0.009 |
| IL5RA       | 4.983             | 0.229                       | 3.5e-10 | TIMM23      | 11.405            | 14.657                      | 0.009 |
| C2          | 1.678             | 8.219                       | 3.9e-10 | MELK        | 0.486             | 1.617                       | 0.009 |
| KIF20A      | 0.415             | 1.284                       | 3.9e-10 | AURKB       | 3.83              | 6.467                       | 0.009 |
| LIPA        | 34.561            | 72.45                       | 4.2e-10 | TMEM60      | 4.789             | 6.382                       | 0.009 |
| YPEL1       | 16.44             | 5.427                       | 4.9e-10 | PRAF2       | 15.961            | 6.731                       | 0.009 |
| BUB1        | 0.807             | 2.96                        | 8.3e-10 | TMEM51      | 0.171             | 0.527                       | 0.009 |
| CCR3        | 12.779            | 0.409                       | 8.4e-10 | ZNF540      | 2.561             | 1.156                       | 0.009 |
| CPA3        | 7.28              | 0.177                       | 9.4e-10 | UQCR10      | 42.322            | 61.687                      | 0.009 |
| CDCA5       | 0.531             | 3.258                       | 1.1e-9  | DMRTC2      | 0.54              | 0.054                       | 0.009 |
| IGKV3-20    | 44.809            | 572.206                     | 1.2e-9  | ITGA1       | 1.512             | 2.323                       | 0.009 |
| CDC20       | 0.994             | 5.002                       | 1.4e-9  | NAGA        | 21.77             | 44.485                      | 0.009 |
| ASPM        | 0.175             | 0.969                       | 1.4e-9  | WDR45P1     | 0.15              | 1.016                       | 0.009 |
| IGHV4-39    | 14.089            | 556.548                     | 1.9e-9  | HLA-H       | 0.293             | 0                           | 0.009 |
| TOP2A       | 1.208             | 3.166                       | 2.0e-9  | STAG3L2     | 18.635            | 8.468                       | 0.009 |
| C1QC        | 0.356             | 8.089                       | 5.5e-9  | SPR         | 0.771             | 1.754                       | 0.009 |
| IGKV3D-20   | 1.45              | 24.568                      | 5.5e-9  | MARCKSL1    | 28.277            | 8.906                       | 0.009 |
| MAOA        | 0.044             | 14.276                      | 6.3e-9  | DBNDD2      | 7.95              | 14.694                      | 0.009 |
| KIF4A       | 0.072             | 0.578                       | 6.4e-9  | ETFA        | 37.798            | 50.108                      | 0.009 |
| VSIG4       | 1.406             | 77.693                      | 6.5e-9  | MSH3        | 3.59              | 5.187                       | 0.009 |

**Table S1. Continuation**

| Gene Symbol | Base Mean Control | Base Mean COVID-19 patients | P adj  | Gene Symbol | Base Mean Control | Base Mean COVID-19 patients | P adj |
|-------------|-------------------|-----------------------------|--------|-------------|-------------------|-----------------------------|-------|
| SIGLEC16    | 1.205             | 7.221                       | 6.9e-9 | IFNGR2      | 22.158            | 52.356                      | 0.009 |
| CCL4L2      | 15.391            | 0.922                       | 7.0e-9 | EBF4        | 4.853             | 0.994                       | 0.009 |
| AGAP1       | 8.632             | 1.306                       | 7.0e-9 | TBCC        | 29.178            | 12.48                       | 0.009 |
| ZNF266      | 56.064            | 14.047                      | 7.0e-9 | TRPM2       | 7.82              | 16.992                      | 0.009 |
| CCNB2       | 0.784             | 3.796                       | 7.5e-9 | POLDIP2     | 20.772            | 28.116                      | 0.009 |
| FAM20C      | 1.862             | 11.872                      | 7.7e-9 | ARID4A      | 43.743            | 22.15                       | 0.009 |
| MGST1       | 8.711             | 62.114                      | 8.3e-9 | DRAM2       | 63.826            | 88.331                      | 0.009 |
| CBR1        | 7.323             | 14.608                      | 9.6e-9 | UPP1        | 57.739            | 97.931                      | 0.009 |
| SIGLEC11    | 0.617             | 3.384                       | 1.0e-8 | AP000936.3  | 15.753            | 2.086                       | 0.009 |
| ALDH4A1     | 1.805             | 4.204                       | 1.1e-8 | AL079341.1  | 0.792             | 0.053                       | 0.009 |
| RNASE1      | 0.609             | 44.436                      | 1.1e-8 | AL365205.1  | 1.259             | 2.707                       | 0.009 |
| CRY1        | 14.088            | 4.131                       | 1.2e-8 | AC125612.1  | 4.174             | 0.22                        | 0.01  |
| BIRC5       | 0.592             | 3.506                       | 1.5e-8 | ADAM9       | 9.595             | 22.247                      | 0.01  |
| PDZD4       | 40.726            | 7.012                       | 1.5e-8 | GPR68       | 7.432             | 2.29                        | 0.01  |
| CENPW       | 1.14              | 5.281                       | 1.5e-8 | GAA         | 67.41             | 129.297                     | 0.01  |
| ME1         | 0.294             | 2.004                       | 1.7e-8 | ATP5PD      | 107.554           | 147.894                     | 0.01  |
| IGHV3-20    | 1.605             | 76.446                      | 1.8e-8 | MSC         | 3.362             | 0.651                       | 0.01  |
| CDHR1       | 1.575             | 0.41                        | 1.8e-8 | JAK2        | 19.612            | 36.43                       | 0.01  |
| CES1        | 4.525             | 118.134                     | 2.3e-8 | KNDC1       | 1.023             | 0.124                       | 0.01  |
| NUAK1       | 3.114             | 0.192                       | 2.6e-8 | PPFIA3      | 1.983             | 0.768                       | 0.01  |
| HJURP       | 1.286             | 2.656                       | 3.6e-8 | CYB5R3      | 34.646            | 44.472                      | 0.01  |
| SLC1A3      | 0.444             | 11.222                      | 4.5e-8 | MAN2B1      | 117.035           | 179.289                     | 0.01  |
| MRC1        | 0.14              | 3.574                       | 4.6e-8 | RPN1        | 64.561            | 80.092                      | 0.01  |
| KIR2DP1     | 1.462             | 0                           | 5.0e-8 | ERMAP       | 8.703             | 13.955                      | 0.01  |
| MKI67       | 0.975             | 4.52                        | 5.0e-8 | ZNF354B     | 42.186            | 8.017                       | 0.01  |
| NUSAP1      | 3.379             | 9.746                       | 5.7e-8 | PSEN2       | 4.496             | 6.379                       | 0.01  |
| MYBL1       | 50.918            | 7.218                       | 7.3e-8 | S100A10     | 306.426           | 449.828                     | 0.01  |
| PTGFRN      | 0.243             | 1.062                       | 7.6e-8 | GLB1        | 39.298            | 56.111                      | 0.01  |
| GLI3        | 0.297             | 0.033                       | 7.6e-8 | HAUS1P1     | 0.296             | 1.059                       | 0.01  |
| MPDU1       | 23.066            | 43.619                      | 7.7e-8 | AC007182.2  | 1.138             | 6.808                       | 0.01  |
| IGKV2-30    | 13.39             | 131.965                     | 8.7e-8 | IGLVI-70    | 0.615             | 3.9                         | 0.01  |
| TK1         | 1.93              | 5.606                       | 8.7e-8 | HEBP1       | 16.619            | 24.928                      | 0.01  |
| IGHA1       | 111.174           | 450.344                     | 1.2e-7 | BAX         | 87.087            | 108.045                     | 0.01  |
| ACCS        | 19.879            | 66.17                       | 1.2e-7 | VDAC2       | 66.372            | 69.505                      | 0.01  |
| SHCBP1      | 1.756             | 5.631                       | 1.2e-7 | BCL11B      | 36.814            | 7.36                        | 0.01  |
| C16orf45    | 5.486             | 1.523                       | 1.3e-7 | CD200R1     | 2.155             | 0.531                       | 0.01  |
| ACVRL1      | 0.664             | 2.526                       | 1.3e-7 | AC005912.1  | 6.229             | 0.573                       | 0.01  |
| RXRB        | 6.649             | 0.012                       | 1.3e-7 | KLRD1       | 55.809            | 26.128                      | 0.01  |
| NT5DC2      | 2.99              | 17.851                      | 1.4e-7 | STAT4       | 83.239            | 23.27                       | 0.01  |
| MMP23B      | 21.532            | 6.637                       | 1.5e-7 | PAQR4       | 4.157             | 7.152                       | 0.01  |
| FCAR        | 4.868             | 9.246                       | 1.7e-7 | BRK1        | 80.32             | 105.702                     | 0.01  |
| IGKV1-16    | 5.281             | 68.039                      | 1.7e-7 | CFH         | 4.608             | 0.935                       | 0.01  |
| KIF11       | 0.739             | 1.785                       | 1.7e-7 | CHI3L1      | 37.645            | 3.577                       | 0.01  |
| ATP5F1B     | 226.415           | 293.567                     | 1.9e-7 | TRAF7       | 25.032            | 35.54                       | 0.011 |
| MS4A2       | 8.159             | 0.903                       | 2.3e-7 | NDUFB10     | 58.135            | 78.072                      | 0.011 |
| CACNG6      | 1.665             | 0.044                       | 2.4e-7 | TTC39B      | 19.273            | 8.659                       | 0.011 |
| BTG1P1      | 20.072            | 2.207                       | 3.1e-7 | PGD         | 111.061           | 252.797                     | 0.011 |
| MRPL37      | 18.152            | 30.117                      | 4.1e-7 | P3H4        | 5.731             | 2.663                       | 0.011 |
| AC256203.2  | 2.121             | 0.41                        | 4.1e-7 | WNT11       | 0.261             | 1.331                       | 0.011 |
| B3GALT4     | 2.381             | 4.978                       | 4.1e-7 | GATB        | 4.983             | 7.655                       | 0.011 |
| TRDC        | 115.054           | 24.886                      | 4.1e-7 | ZBTB32      | 1.01              | 3.127                       | 0.011 |

**Table S1. Continuation**

| Gene Symbol | Base Mean Control | Base Mean COVID-19 patients | P adj  | Gene Symbol | Base Mean Control | Base Mean COVID-19 patients | P adj |
|-------------|-------------------|-----------------------------|--------|-------------|-------------------|-----------------------------|-------|
| SLCO4A1     | 0.72              | 2.049                       | 4.1e-7 | TTC38       | 48.364            | 23.564                      | 0.011 |
| TSPYL1      | 55.526            | 17.472                      | 4.2e-7 | ADAMDEC1    | 0.102             | 0.482                       | 0.011 |
| IGKV1D-39   | 26.08             | 803.531                     | 4.2e-7 | ANK3        | 6.55              | 1.912                       | 0.011 |
| IGKV2-28    | 16.808            | 629.318                     | 4.6e-7 | CD226       | 49.165            | 24.979                      | 0.011 |
| HLA-K       | 0                 | 1.435                       | 5.3e-7 | MARCO       | 5.924             | 18.361                      | 0.011 |
| RNASE2      | 10.487            | 191.492                     | 5.3e-7 | APOBEC3A    | 0.092             | 1.076                       | 0.011 |
| LTA         | 0                 | 1.245                       | 5.6e-7 | PRF1        | 152.883           | 47.449                      | 0.011 |
| GSTM1       | 13.128            | 0.419                       | 5.6e-7 | GAD2        | 0.275             | 0.014                       | 0.011 |
| VDAC1       | 31.205            | 50.315                      | 5.6e-7 | NAIP        | 28.09             | 57.102                      | 0.011 |
| MRPL51      | 22.034            | 34.018                      | 6.1e-7 | IL2RB       | 80.123            | 22.574                      | 0.011 |
| CACNA2D2    | 13.443            | 2.575                       | 6.1e-7 | PSMB3       | 91.052            | 123.692                     | 0.011 |
| CDCA2       | 0.158             | 0.705                       | 6.8e-7 | DNAH10      | 0.872             | 0.233                       | 0.011 |
| CTSB        | 159.233           | 426.896                     | 7.1e-7 | PTENP1      | 0.211             | 0.026                       | 0.011 |
| COX5A       | 68.791            | 120.535                     | 7.2e-7 | PI3         | 66.353            | 1.806                       | 0.011 |
| IGLV3-25    | 4.24              | 548.645                     | 7.6e-7 | ABHD17A     | 146.692           | 58.149                      | 0.011 |
| IGHV3-48    | 10.505            | 234.173                     | 7.8e-7 | KANK3       | 1.858             | 0.538                       | 0.011 |
| MRPL15      | 5.086             | 14.354                      | 7.8e-7 | SCPEP1      | 65.898            | 155.692                     | 0.011 |
| IGKV1-5     | 16.788            | 186.526                     | 7.8e-7 | PLA2G4A     | 1.094             | 3.244                       | 0.011 |
| ZMAT4       | 2.317             | 0.49                        | 7.8e-7 | ANKRD20A5P  | 11.713            | 4.105                       | 0.011 |
| BUB1B       | 1.043             | 2.473                       | 8.5e-7 | RHEBL1      | 6.273             | 2.115                       | 0.011 |
| TRIP13      | 0.541             | 1.496                       | 9.1e-7 | PTMAP4      | 4.824             | 0.255                       | 0.011 |
| CLEC12A     | 49.127            | 251.833                     | 9.2e-7 | PCK2        | 10.212            | 14.69                       | 0.012 |
| LST1        | 0                 | 1.091                       | 1.0e-6 | SHMT1       | 4.629             | 9.258                       | 0.012 |
| C1QB        | 1.205             | 15.558                      | 1.0e-6 | DNAAF2      | 4.708             | 2.13                        | 0.012 |
| ECHDC3      | 1.621             | 8.348                       | 1.1e-6 | AAMP        | 37.783            | 43.966                      | 0.012 |
| RRM2        | 2.377             | 13.254                      | 1.1e-6 | PGK1        | 150.937           | 194.546                     | 0.012 |
| CAV1        | 0.093             | 0.841                       | 1.2e-6 | SERPINB10   | 0.776             | 1.846                       | 0.012 |
| CBWD2       | 20.115            | 29.571                      | 1.3e-6 | BCL2L13     | 18.152            | 25.365                      | 0.012 |
| PTGFR       | 0                 | 0.571                       | 1.3e-6 | SKI         | 29.038            | 13.93                       | 0.012 |
| IGKV2-24    | 2.017             | 98.091                      | 1.6e-6 | HES4        | 5.021             | 1.362                       | 0.012 |
| C1QA        | 3.084             | 17.095                      | 1.6e-6 | SEC61A1     | 73.485            | 85.291                      | 0.012 |
| CAMK2N1     | 2.903             | 0.213                       | 1.6e-6 | YES1        | 4.496             | 1.583                       | 0.012 |
| PAPSS1      | 11.566            | 16.758                      | 1.7e-6 | VSIG10L     | 0.385             | 0.898                       | 0.012 |
| KLRB1       | 64.65             | 11.437                      | 1.7e-6 | GSTM2       | 61.324            | 21.042                      | 0.012 |
| CREG1       | 32.094            | 83.257                      | 1.7e-6 | SLC39A11    | 16.68             | 19.431                      | 0.012 |
| SLC1A7      | 4.983             | 0.331                       | 1.8e-6 | SAMD3       | 81.036            | 28.766                      | 0.012 |
| CCNB1       | 1.353             | 3.683                       | 1.9e-6 | ADAMTS1     | 1.432             | 0.422                       | 0.012 |
| POLQ        | 0.875             | 1.576                       | 1.9e-6 | KNSTRN      | 3.537             | 5.664                       | 0.012 |
| NCAPG       | 0.592             | 1.824                       | 2.1e-6 | TRIM10      | 0.249             | 0.006                       | 0.012 |
| NETO2       | 2.221             | 8.296                       | 2.6e-6 | M6PR        | 120.23            | 128.88                      | 0.012 |
| VDAC2P2     | 3.409             | 0.36                        | 2.6e-6 | SMTN        | 2.357             | 6.232                       | 0.012 |
| LAMA2       | 0.711             | 0.284                       | 2.7e-6 | SIGLEC9     | 20.605            | 41.152                      | 0.012 |
| TMTC1       | 0.779             | 3.207                       | 2.7e-6 | AC111000.1  | 0.809             | 0.011                       | 0.012 |
| TOPORS      | 11.955            | 3.664                       | 2.9e-6 | FPGT        | 3.251             | 5.646                       | 0.012 |
| TRIM51BP    | 2.49              | 0.009                       | 3.0e-6 | SGIP1       | 0.21              | 2.121                       | 0.012 |
| KLF15       | 16.434            | 0.076                       | 3.0e-6 | NANS        | 30.941            | 37.55                       | 0.012 |
| EPHX4       | 1.318             | 0.167                       | 3.1e-6 | OR7E122P    | 2.555             | 1.194                       | 0.012 |
| PRSS23      | 18.449            | 3.943                       | 3.3e-6 | KCNK17      | 1.221             | 0.087                       | 0.012 |
| IGHV5-51    | 6.128             | 7.2e-4                      | 3.6e-6 | OVCA2       | 15.733            | 20.799                      | 0.012 |
| AKR1C3      | 7.34              | 2.048                       | 3.9e-6 | TATDN1P1    | 2.061             | 0.223                       | 0.012 |
| EPS8        | 2.558             | 5.531                       | 4.0e-6 | PRR11       | 3.612             | 4.997                       | 0.012 |
| UGT2B11     | 3.611             | 0.044                       | 4.1e-6 | ZDHHC5      | 21.66             | 22.159                      | 0.012 |

**Table S1. Continuation**

| Gene Symbol    | Base Mean Control | Base Mean COVID-19 patients | P adj  | Gene Symbol | Base Mean Control | Base Mean COVID-19 patients | P adj |
|----------------|-------------------|-----------------------------|--------|-------------|-------------------|-----------------------------|-------|
| PSMD3          | 28.092            | 36.819                      | 4.1e-6 | PLL         | 12.59             | 1.422                       | 0.012 |
| IGHV3-33       | 14.368            | 328.873                     | 4.1e-6 | NDUFB9      | 99.552            | 137.741                     | 0.012 |
| PRSS57         | 4.577             | 0.616                       | 4.2e-6 | PREB        | 18.014            | 23.3                        | 0.012 |
| AC270300.3     | 11.073            | 0                           | 4.2e-6 | ATP6V1B2    | 62.337            | 108.968                     | 0.012 |
| ENO1           | 240.435           | 473.846                     | 4.4e-6 | PYCARD      | 52.508            | 77.371                      | 0.012 |
| HLA-H          | 0                 | 0.795                       | 4.4e-6 | PNP         | 40.426            | 77.881                      | 0.012 |
| P2RX4          | 22.575            | 37.543                      | 4.4e-6 | DDX49       | 23.691            | 25.303                      | 0.012 |
| MYOF           | 3.573             | 14.288                      | 5.0e-6 | STIL        | 1.715             | 1.963                       | 0.012 |
| LAMC1          | 0.595             | 4.114                       | 5.0e-6 | SNX19       | 20.72             | 24.74                       | 0.012 |
| CXCL8          | 1787.84           | 52.492                      | 5.3e-6 | MICB        | 0.109             | 0                           | 0.012 |
| AL162151.2     | 14.743            | 0                           | 5.7e-6 | THG1L       | 4.678             | 7.191                       | 0.013 |
| CBWD1          | 19.9              | 30.822                      | 6.1e-6 | C11orf74    | 1.818             | 3.804                       | 0.013 |
| FLVCR2         | 4.406             | 18.436                      | 6.2e-6 | DUSP2       | 84.114            | 19.859                      | 0.013 |
| CCR2           | 5.281             | 27.128                      | 6.4e-6 | COPG2       | 5.193             | 6.17                        | 0.013 |
| TIMM8B         | 11.654            | 20.935                      | 6.4e-6 | IRF5        | 25.71             | 66.691                      | 0.013 |
| GPX1           | 257.39            | 576.97                      | 6.5e-6 | ERBB2       | 7.723             | 3.012                       | 0.013 |
| PRDX1          | 47.926            | 87.357                      | 7.5e-6 | Z84492.2    | 7.711             | 2.279                       | 0.013 |
| ACO2           | 32.573            | 46.978                      | 7.5e-6 | LRPAP1      | 50.282            | 67.262                      | 0.013 |
| TROAP          | 1.34              | 2.962                       | 8.6e-6 | NOG         | 1.679             | 0.183                       | 0.013 |
| IGHV2-70       | 2.493             | 169.103                     | 9.2e-6 | STARD13     | 0.179             | 1.179                       | 0.013 |
| KLRG1          | 41.434            | 6.394                       | 9.2e-6 | RAD23B      | 33.274            | 44.127                      | 0.013 |
| IDH1           | 10.373            | 27.736                      | 9.2e-6 | IGKV6-21    | 1.131             | 12.446                      | 0.013 |
| IGHV3-30       | 8.137             | 568.55                      | 9.7e-6 | TOR4A       | 3.698             | 6.214                       | 0.013 |
| SOX13          | 9.896             | 2.163                       | 9.8e-6 | KIAA1147    | 19.994            | 8.397                       | 0.013 |
| EGR3           | 6.308             | 0.264                       | 1.0e-5 | AC089984.2  | 2.886             | 0.39                        | 0.013 |
| AC025884.1     | 7.172             | 0.916                       | 1.1e-5 | CDC42BPA    | 0.452             | 0.986                       | 0.013 |
| CST7           | 207.015           | 47.764                      | 1.2e-5 | SYNGR2      | 66.528            | 95.663                      | 0.013 |
| PSMA4          | 59.826            | 99.641                      | 1.2e-5 | DDIT4       | 59.649            | 123.993                     | 0.013 |
| PPARGC1B       | 3.554             | 5.784                       | 1.3e-5 | IGIP        | 1.891             | 0.595                       | 0.013 |
| KIF15          | 0.379             | 0.911                       | 1.3e-5 | HNRNPA1P76  | 1.236             | 0.146                       | 0.013 |
| AC114797.1     | 4.421             | 0.021                       | 1.3e-5 | GK5         | 39.492            | 15.842                      | 0.013 |
| C15orf38-AP3S2 | 1.034             | 4.455                       | 1.4e-5 | NBPF3       | 17.857            | 7.479                       | 0.013 |
| TFDP2          | 27.649            | 10.574                      | 1.4e-5 | GGH         | 1.535             | 3.722                       | 0.013 |
| TMIGD3         | 0.584             | 15.382                      | 1.4e-5 | NOV         | 2.708             | 0.412                       | 0.013 |
| IGKV1-9        | 0.816             | 74.272                      | 1.4e-5 | AC073349.2  | 4.362             | 1.65                        | 0.013 |
| ATP5PB         | 96.321            | 155.866                     | 1.5e-5 | FKBP1B      | 2.36              | 5.538                       | 0.013 |
| IGLV2-14       | 15.01             | 979.642                     | 1.5e-5 | TEX101      | 1.506             | 0.09                        | 0.013 |
| MSR1           | 6.87              | 15.195                      | 1.6e-5 | SERPINB1    | 89.085            | 141.268                     | 0.013 |
| ABCF2          | 1.996             | 4.736                       | 1.6e-5 | PLOD1       | 22.862            | 33.907                      | 0.014 |
| PRSS33         | 1.029             | 0.024                       | 1.6e-5 | ST6GALNAC3  | 1.282             | 4.662                       | 0.014 |
| EXO1           | 0.678             | 1.799                       | 1.7e-5 | EPSTI1      | 17.449            | 35.394                      | 0.014 |
| IGLV6-57       | 5.856             | 196.594                     | 1.7e-5 | IGLV2-8     | 8.539             | 62.889                      | 0.014 |
| AP2S1          | 48.609            | 80.052                      | 1.7e-5 | AL008707.1  | 0.022             | 2.167                       | 0.014 |
| CCDC184        | 1.137             | 0.168                       | 1.8e-5 | AL354822.1  | 3.322             | 0.822                       | 0.014 |
| ZBTB20         | 30.243            | 14.798                      | 1.8e-5 | HP          | 3.651             | 19.016                      | 0.014 |
| IGKV3-15       | 24.461            | 173.997                     | 1.8e-5 | PPP1R13B    | 14.466            | 7.776                       | 0.014 |
| BRD2           | 0.25              | 3.286                       | 1.8e-5 | UCHL3       | 13.393            | 18.073                      | 0.014 |
| GPER1          | 0.343             | 5.079                       | 1.9e-5 | PRC1        | 12.035            | 11.082                      | 0.014 |
| BCKDHA         | 15.627            | 33.093                      | 1.9e-5 | CABP4       | 4.994             | 1.793                       | 0.014 |
| HSD17B10       | 33.18             | 45.464                      | 1.9e-5 | IL10        | 0.703             | 2.357                       | 0.014 |
| TCN2           | 4.308             | 34.113                      | 1.9e-5 | NCR3        | 27.123            | 5.416                       | 0.014 |
| MMP19          | 0.238             | 2.118                       | 2.0e-5 | TMEM144     | 4.607             | 23.124                      | 0.014 |

**Table S1. Continuation**

| Gene Symbol | Base Mean Control | Base Mean COVID-19 patients | P adj  | Gene Symbol | Base Mean Control | Base Mean COVID-19 patients | P adj |
|-------------|-------------------|-----------------------------|--------|-------------|-------------------|-----------------------------|-------|
| RPL10P19    | 9.824             | 1.449                       | 2.1e-5 | BTG2        | 237.153           | 50.273                      | 0.014 |
| KCNMA1      | 0.549             | 2.604                       | 2.1e-5 | EAF2        | 11.304            | 24.371                      | 0.014 |
| CENPU       | 2.785             | 6.911                       | 2.1e-5 | MYBPH       | 0.544             | 0.034                       | 0.014 |
| SLC22A16    | 1.447             | 3.717                       | 2.2e-5 | TTC22       | 7.317             | 2.436                       | 0.014 |
| TYMS        | 2.653             | 11.42                       | 2.3e-5 | PRPS1P2     | 3.694             | 5.416                       | 0.014 |
| AREG        | 4.217             | 58.781                      | 2.3e-5 | GNL2        | 31.322            | 33.186                      | 0.014 |
| IGLV2-11    | 12.38             | 159.532                     | 2.3e-5 | ACP2        | 8.891             | 10.756                      | 0.014 |
| FAM169A     | 5.757             | 1.874                       | 2.3e-5 | TNS3        | 6.192             | 14.364                      | 0.014 |
| ANLN        | 0.498             | 1.239                       | 2.4e-5 | HESX1       | 0.243             | 1.413                       | 0.014 |
| PLK1        | 1.139             | 3.825                       | 2.4e-5 | STEAP3      | 1.501             | 3.398                       | 0.014 |
| DDR1        | 2.024             | 0.696                       | 2.5e-5 | OGDH        | 34.356            | 39.736                      | 0.014 |
| IGHV3-21    | 14.426            | 206.158                     | 2.6e-5 | PDCD6IP     | 74.334            | 115.663                     | 0.014 |
| TPSAB1      | 1.408             | 0                           | 2.6e-5 | ARPIN       | 1.199             | 4.46                        | 0.014 |
| KIR2DL3     | 4.668             | 0.005                       | 2.6e-5 | OPN3        | 8.367             | 12.653                      | 0.014 |
| AC234301.3  | 0.965             | 38.078                      | 2.6e-5 | DPP3        | 19.008            | 21.483                      | 0.014 |
| METTL9      | 81.502            | 219.841                     | 2.7e-5 | AC015802.6  | 5.989             | 2.932                       | 0.014 |
| PTGDR       | 14.951            | 2.94                        | 2.8e-5 | HNRNPMP1    | 0.563             | 0.033                       | 0.014 |
| MILR1       | 15.846            | 41.773                      | 3.3e-5 | NDUFB1      | 88.524            | 145.113                     | 0.014 |
| RNASE4      | 1.899             | 16.235                      | 3.4e-5 | C12orf4     | 7.972             | 10.105                      | 0.014 |
| SCD         | 0.956             | 2.399                       | 3.4e-5 | MAFB        | 15.108            | 38.606                      | 0.015 |
| LINC01835   | 7.447             | 0                           | 3.4e-5 | IGKV3D-11   | 0.418             | 4.32                        | 0.015 |
| GLDN        | 0.165             | 4.644                       | 3.4e-5 | OSCAR       | 1.448             | 3.66                        | 0.015 |
| ABCD1       | 7.989             | 14.329                      | 3.4e-5 | MLLT6       | 189.545           | 82.789                      | 0.015 |
| UAP1L1      | 8.971             | 19.184                      | 3.4e-5 | GIMAP3P     | 2.723             | 0.893                       | 0.015 |
| CENPF       | 2.287             | 2.779                       | 3.4e-5 | S100A6      | 543.902           | 814.268                     | 0.015 |
| KCTD3       | 3.881             | 8.349                       | 3.4e-5 | DMAC2       | 17.879            | 22.287                      | 0.015 |
| CDC6        | 0.676             | 1.741                       | 3.4e-5 | CXCL5       | 7.401             | 0.533                       | 0.015 |
| NRG1        | 3.004             | 11.141                      | 3.4e-5 | BCKDK       | 13.747            | 22.597                      | 0.015 |
| ESPL1       | 0.624             | 1.468                       | 3.5e-5 | AC022217.1  | 0.66              | 5.526                       | 0.015 |
| CLDN10      | 3.605             | 0.52                        | 3.7e-5 | CLDN22      | 0.344             | 0                           | 0.015 |
| FGF23       | 19.728            | 0.024                       | 3.9e-5 | AC138409.1  | 1.751             | 0.288                       | 0.015 |
| CANX        | 49.499            | 104.921                     | 3.9e-5 | ARHGFE25    | 0.905             | 0.407                       | 0.015 |
| PLD3        | 95.003            | 170.321                     | 3.9e-5 | KDELR1      | 35.721            | 42.848                      | 0.015 |
| LGR6        | 13.14             | 2.422                       | 4.0e-5 | PCCB        | 10.21             | 11.623                      | 0.015 |
| ALOX15B     | 0.487             | 14.507                      | 4.2e-5 | ITGB8       | 1.204             | 0.188                       | 0.015 |
| SH3PXD2B    | 0.374             | 2.275                       | 4.3e-5 | MRPS10      | 8.881             | 10.204                      | 0.015 |
| SEMA4C      | 19.178            | 4.637                       | 4.4e-5 | PSTPIP2     | 25.602            | 42.767                      | 0.015 |
| CDK5        | 4.916             | 10.277                      | 4.6e-5 | SRPK2       | 49.594            | 23.554                      | 0.015 |
| CD163       | 34.924            | 315.372                     | 4.6e-5 | ARID4B      | 64.52             | 19.747                      | 0.015 |
| CEP78       | 49.569            | 13.335                      | 4.7e-5 | GTF3C6      | 21.073            | 25.075                      | 0.015 |
| ZBTB43      | 12.386            | 22.674                      | 4.8e-5 | SQLE        | 8.065             | 9.825                       | 0.015 |
| RAPH1       | 0.847             | 1.456                       | 4.9e-5 | UQCRFS1P1   | 9.84              | 13.329                      | 0.015 |
| SDC1        | 0.036             | 1.687                       | 4.9e-5 | C12orf29    | 10.151            | 5.7                         | 0.015 |
| TCN1        | 4.821             | 0.434                       | 4.9e-5 | LPCAT3      | 17.363            | 17.051                      | 0.015 |
| PSMB6       | 54.917            | 73.01                       | 4.9e-5 | TMEM256     | 33.693            | 47.673                      | 0.015 |
| COPB2       | 26.015            | 34.545                      | 4.9e-5 | PIGY        | 6.779             | 1.8e-5                      | 0.015 |
| LINC00869   | 311.913           | 106.34                      | 5.0e-5 | DHRS3       | 15.644            | 4.308                       | 0.016 |
| ATP5MF      | 151.497           | 236.712                     | 5.0e-5 | EMILIN2     | 24.279            | 48.873                      | 0.016 |
| IGHV1-18    | 13.275            | 122.318                     | 5.1e-5 | MEF2A       | 25.855            | 41.393                      | 0.016 |
| TNFSF10     | 24.927            | 44.715                      | 5.1e-5 | FGFBP2      | 197.209           | 41.852                      | 0.016 |
| CDC45       | 0.568             | 2.516                       | 5.2e-5 | MYD88       | 64.214            | 105.784                     | 0.016 |
| CBX7        | 53.965            | 22.095                      | 5.3e-5 | IGFBP3      | 4.099             | 0.4                         | 0.016 |

**Table S1. Continuation**

| Gene Symbol | Base Mean Control | Base Mean COVID-19 patients | P adj  | Gene Symbol | Base Mean Control | Base Mean COVID-19 patients | P adj |
|-------------|-------------------|-----------------------------|--------|-------------|-------------------|-----------------------------|-------|
| ADGRB2      | 1.484             | 0.313                       | 5.3e-5 | PRDM5       | 13.221            | 5.549                       | 0.016 |
| WDR18       | 9.393             | 12.629                      | 5.4e-5 | SDCCAG8     | 13.377            | 19.009                      | 0.016 |
| PZP         | 12.203            | 1.253                       | 5.5e-5 | EPHB2       | 0.923             | 4.624                       | 0.016 |
| SYTL2       | 98.155            | 15.614                      | 5.5e-5 | TSG101      | 37.041            | 37.981                      | 0.016 |
| GBGT1       | 8.596             | 16.679                      | 5.6e-5 | KIAA2026    | 37.401            | 20.084                      | 0.016 |
| NLRP2       | 0                 | 0.245                       | 5.6e-5 | TOLLIP      | 25.221            | 36.338                      | 0.016 |
| FAM96A      | 32.643            | 48.593                      | 5.7e-5 | ZC3H12C     | 0.431             | 1.246                       | 0.016 |
| HCG4P7      | 0.119             | 1.488                       | 5.7e-5 | RPUSD2      | 7.813             | 3.107                       | 0.016 |
| DEPDC1      | 0.143             | 0.318                       | 5.8e-5 | IGHV3-33    | 5.709             | 526.69                      | 0.016 |
| IGHV3-53    | 0.694             | 24.312                      | 5.8e-5 | CDKN2B      | 1.515             | 5.992                       | 0.016 |
| PRRG3       | 1.524             | 0.029                       | 6.2e-5 | TSEN54      | 66.477            | 25.637                      | 0.016 |
| MYO1E       | 3.516             | 8.932                       | 6.3e-5 | FAM212A     | 1.133             | 4.446                       | 0.016 |
| ZFPM1       | 10.771            | 2.689                       | 6.3e-5 | IFITM3      | 92.511            | 237.04                      | 0.016 |
| MINOS1-NBL1 | 0                 | 0.668                       | 6.4e-5 | ZNF611      | 26.542            | 15.393                      | 0.016 |
| PRDX3       | 23.048            | 49.617                      | 6.5e-5 | FGF14       | 0.085             | 5.5e-4                      | 0.016 |
| IGLV1-47    | 17.822            | 162.412                     | 6.6e-5 | GYS1        | 29.258            | 26.385                      | 0.016 |
| ANKRD30BL   | 85.39             | 1.359                       | 6.8e-5 | PSMD14      | 14.155            | 14.839                      | 0.016 |
| TIMP4       | 0.005             | 1.757                       | 7.0e-5 | C8G         | 7.85              | 2.549                       | 0.016 |
| RAB20       | 3.254             | 11.783                      | 7.0e-5 | MUC6        | 0.827             | 0.149                       | 0.016 |
| DHCR24      | 3.141             | 4.94                        | 7.0e-5 | ANKRD20A7P  | 0.367             | 0.039                       | 0.016 |
| TNFAIP8L2   | 5.129             | 10.364                      | 7.1e-5 | TRMT6       | 7.977             | 18.428                      | 0.016 |
| IGHV3-11    | 4.661             | 72.072                      | 7.1e-5 | CNDP2       | 77.152            | 99.392                      | 0.016 |
| NCALD       | 22.922            | 7.241                       | 7.3e-5 | DNAH10      | 1.32              | 0.844                       | 0.016 |
| NTSR1       | 0.731             | 7.257                       | 7.7e-5 | YRDC        | 19.215            | 7.937                       | 0.016 |
| MT1E        | 1.391             | 5.044                       | 7.8e-5 | SASH1       | 1.306             | 3.225                       | 0.016 |
| TSPOAP1     | 61.57             | 23.496                      | 7.8e-5 | PODN        | 1.243             | 0.327                       | 0.016 |
| PSMB2       | 18.235            | 26.967                      | 8.0e-5 | CBX2        | 0.08              | 0.454                       | 0.016 |
| NME2        | 136.872           | 188.112                     | 8.2e-5 | DCTN6       | 17.034            | 20.412                      | 0.016 |
| IGHG2       | 24.574            | 130.91                      | 8.6e-5 | CKB         | 5.858             | 1.768                       | 0.016 |
| IGLV4-69    | 6.499             | 66.624                      | 8.6e-5 | PLPP3       | 0.23              | 0.88                        | 0.016 |
| COLGALT2    | 2.748             | 0.527                       | 8.6e-5 | AHCY        | 13.965            | 18.777                      | 0.016 |
| EZH2        | 13.902            | 26.517                      | 8.6e-5 | HLA-V       | 1.343             | 0.075                       | 0.016 |
| LTBP4       | 86.289            | 22.204                      | 8.6e-5 | RNF144A     | 9.593             | 3.333                       | 0.016 |
| IGHV6-1     | 5.071             | 54.68                       | 8.6e-5 | AC006509.1  | 5.925             | 0.601                       | 0.016 |
| MICU1       | 16.862            | 27.969                      | 8.6e-5 | JADE1       | 19.578            | 10.051                      | 0.017 |
| CAPRIN1     | 54.022            | 61.695                      | 8.6e-5 | FUT11       | 22.387            | 8.646                       | 0.017 |
| IGKC        | 351.426           | 3416.79                     | 8.7e-5 | TRIM27      | 11.661            | 9.696                       | 0.017 |
| PTCH1       | 20.192            | 7.148                       | 8.7e-5 | H2AFY       | 142.189           | 279.604                     | 0.017 |
| VSTM2B      | 0.591             | 0.038                       | 8.8e-5 | ATG101      | 13.696            | 14.71                       | 0.017 |
| SPTBN5      | 4.564             | 1.477                       | 8.8e-5 | HDHD5       | 13.66             | 22.204                      | 0.017 |
| B3GAT1      | 20.555            | 3.977                       | 8.9e-5 | ITGA7       | 1.041             | 2.342                       | 0.017 |
| LYPD2       | 2.812             | 0.014                       | 8.9e-5 | ITFG1       | 17.503            | 20.9                        | 0.017 |
| IGKV1-17    | 1.488             | 43.254                      | 9.0e-5 | OXA1L       | 105.83            | 131.73                      | 0.017 |
| SLC43A3     | 15.805            | 36.044                      | 9.0e-5 | SPOCK2      | 132.372           | 33.692                      | 0.017 |
| PTGDR2      | 1.433             | 0.113                       | 9.1e-5 | COMT        | 43.619            | 63.133                      | 0.017 |
| IGKV2D-29   | 3.2               | 148.455                     | 9.2e-5 | IGHV3-72    | 0.842             | 6.346                       | 0.017 |
| RENBP       | 15.62             | 24.883                      | 9.2e-5 | RAD54L      | 1.599             | 1.696                       | 0.017 |
| KRT17P8     | 10.48             | 0.958                       | 9.3e-5 | TMTC3       | 3.856             | 2.243                       | 0.017 |
| ANO5        | 0.141             | 0.612                       | 9.6e-5 | BST2        | 80.496            | 103.199                     | 0.017 |
| UPK3B       | 2.246             | 0.51                        | 9.6e-5 | MTHFR       | 30.731            | 34.448                      | 0.017 |
| AKT3        | 16.211            | 5.574                       | 1.0e-4 | DUSP16      | 13.966            | 5.345                       | 0.017 |

**Table S1. Continuation**

| Gene Symbol | Base Mean Control | Base Mean COVID-19 patients | P adj  | Gene Symbol | Base Mean Control | Base Mean COVID-19 patients | P adj |
|-------------|-------------------|-----------------------------|--------|-------------|-------------------|-----------------------------|-------|
| TGFB3       | 38.138            | 6.538                       | 1.0e-4 | TM4SF19-    |                   |                             |       |
| CKS2        | 4.062             | 9.387                       | 1.0e-4 | TCTEX1D2    | 1.651             | 0.337                       | 0.017 |
| LAP3        | 30.484            | 60.4                        | 1.1e-4 | HVCN1       | 29.201            | 48.233                      | 0.017 |
| ACVR1B      | 5.833             | 14.812                      | 1.1e-4 | JAGN1       | 11.254            | 14.32                       | 0.017 |
| CEP55       | 0.417             | 1.389                       | 1.1e-4 | AC245052.2  | 14.446            | 2.318                       | 0.017 |
| GNPDA1      | 9.484             | 18.113                      | 1.1e-4 | FGD3        | 113.37            | 59.836                      | 0.017 |
| C1orf43     | 59.021            | 88.785                      | 1.1e-4 | TMEM115     | 7.094             | 7.741                       | 0.017 |
| CHRFAM7A    | 0                 | 0.238                       | 1.1e-4 | TRAJ37      | 38.606            | 4.362                       | 0.017 |
| ETHE1       | 20.773            | 25.917                      | 1.2e-4 | LRIG1       | 11.833            | 3.313                       | 0.017 |
| IGLV7-43    | 3.527             | 22.958                      | 1.2e-4 | HLA-V       | 14.11             | 0.764                       | 0.017 |
| PBK         | 0.041             | 0.712                       | 1.2e-4 | CHSY3       | 0.613             | 0.014                       | 0.017 |
| MAGEE1      | 3.074             | 0.578                       | 1.2e-4 | PNKD        | 32.826            | 54.406                      | 0.018 |
| ERAL1       | 11.526            | 13.841                      | 1.3e-4 | AP001885.1  | 3.683             | 0.963                       | 0.018 |
| PPARG       | 0.813             | 6.795                       | 1.3e-4 | ANXA4       | 23.036            | 36.092                      | 0.018 |
| IGLV3-1     | 13.422            | 521.275                     | 1.3e-4 | ITSN1       | 5.273             | 13.221                      | 0.018 |
| UBE2C       | 1.285             | 6.468                       | 1.3e-4 | CFL1        | 594.985           | 627.124                     | 0.018 |
| IGLV1-51    | 26.325            | 1199.347                    | 1.4e-4 | CDH2        | 0.135             | 0.008                       | 0.018 |
| SAPCD2      | 1.289             | 4.477                       | 1.4e-4 | KCNE1       | 3.953             | 11.858                      | 0.018 |
| AKAP12      | 1.013             | 0.045                       | 1.4e-4 | RB1         | 22.177            | 20.892                      | 0.018 |
| FLT3        | 2.67              | 42.322                      | 1.4e-4 | PRDM8       | 8.889             | 3.772                       | 0.018 |
| CYC1        | 47.124            | 65.141                      | 1.5e-4 | GPM6B       | 3.057             | 1.231                       | 0.018 |
| AGK         | 6.287             | 4.165                       | 1.5e-4 | LGALS9C     | 7.823             | 2.433                       | 0.018 |
| CA8         | 2.154             | 0.174                       | 1.6e-4 | SCT         | 5.754             | 0.794                       | 0.018 |
| KIF18B      | 0.31              | 1.061                       | 1.6e-4 | CLTCL1      | 1.93              | 6.329                       | 0.018 |
| RPS6KA5     | 14.172            | 4.525                       | 1.6e-4 | UNC5A       | 0.284             | 0.665                       | 0.018 |
| LDHA        | 134.008           | 238.669                     | 1.6e-4 | ARHGAP23    | 0.185             | 0.577                       | 0.018 |
| CDCA3       | 1.147             | 3.005                       | 1.6e-4 | AC010240.2  | 2.251             | 0.438                       | 0.018 |
| CAT         | 43.231            | 78.819                      | 1.6e-4 | COLGALT1    | 44.51             | 62.037                      | 0.018 |
| PDIA5       | 3.215             | 7.921                       | 1.6e-4 | CLIC5       | 1.553             | 0.395                       | 0.018 |
| SNAPIN      | 11.54             | 20.688                      | 1.6e-4 | OXR1        | 16.642            | 19.054                      | 0.018 |
| SULT1A1     | 19.488            | 67.051                      | 1.6e-4 | FYN         | 304.225           | 136.676                     | 0.018 |
| USH1G       | 0.774             | 0.127                       | 1.6e-4 | TMEM205     | 34.318            | 52.844                      | 0.018 |
| AC245100.4  | 17.444            | 6.148                       | 1.7e-4 | ISM1        | 0.891             | 0.113                       | 0.018 |
| IGHV3-13    | 1.866             | 67.81                       | 1.7e-4 | MARC1       | 15.868            | 71.543                      | 0.018 |
| KIF23       | 1.817             | 2.778                       | 1.7e-4 | DLC1        | 0.043             | 0.245                       | 0.018 |
| PDGFD       | 4.493             | 1.202                       | 1.7e-4 | ATP5PF      | 50.16             | 63.462                      | 0.018 |
| CD163L1     | 0.184             | 2.161                       | 1.7e-4 | PLBD1       | 99.069            | 330.165                     | 0.018 |
| HPRT1       | 13.265            | 16.711                      | 1.7e-4 | HMOX1       | 28.871            | 59.696                      | 0.018 |
| MYO6        | 2.021             | 0.56                        | 1.7e-4 | AMMECR1     | 9.746             | 4.822                       | 0.018 |
| EMC8        | 14.602            | 17.076                      | 1.8e-4 | NLRC4       | 2.643             | 5.789                       | 0.018 |
| TPI1        | 143.603           | 197.113                     | 1.8e-4 | DCPS        | 9.737             | 15.219                      | 0.018 |
| LSS         | 19.425            | 7.989                       | 1.8e-4 | JAG1        | 2.517             | 5.785                       | 0.018 |
| RHOBTB3     | 7.186             | 2.956                       | 1.8e-4 | CEBPA       | 12.456            | 22.515                      | 0.018 |
| NCAPH       | 0.713             | 2.426                       | 1.8e-4 | ECHDC1      | 25.644            | 36.183                      | 0.018 |
| IGHV3-23    | 57.624            | 389.158                     | 1.8e-4 | TMEM37      | 0                 | 0.225                       | 0.018 |
| CD247       | 212.6             | 56.193                      | 1.9e-4 | FRMPD3      | 2.365             | 0.542                       | 0.018 |
| OLFML2A     | 0.226             | 2.149                       | 1.9e-4 | LSM6        | 26.398            | 36.917                      | 0.018 |
| E2F8        | 0.105             | 0.713                       | 1.9e-4 | ZXDB        | 9.071             | 3.6                         | 0.018 |
| RPL23AP23   | 5.339             | 0.627                       | 1.9e-4 | GAS2L3      | 1.189             | 2.75                        | 0.018 |
| MTCH2       | 21.962            | 35.06                       | 1.9e-4 | RAD51AP1    | 0.78              | 2.196                       | 0.018 |
| SKA3        | 0.157             | 0.701                       | 1.9e-4 | MSANTD3     | 10.414            | 4.048                       | 0.018 |
|             |                   |                             |        | GFRA2       | 0.777             | 1.383                       | 0.018 |

**Table S1. Continuation**

| Gene Symbol | Base Mean Control | Base Mean COVID-19 patients | P adj  | Gene Symbol | Base Mean Control | Base Mean COVID-19 patients | P adj |
|-------------|-------------------|-----------------------------|--------|-------------|-------------------|-----------------------------|-------|
| PSMA1       | 85.417            | 91.808                      | 2.0e-4 | TGM3        | 0.445             | 0.021                       | 0.018 |
| JCHAIN      | 51.873            | 649.498                     | 2.0e-4 | IGHG3       | 1.657             | 21.123                      | 0.019 |
| EEF1AKMT4   | 0.509             | 1.389                       | 2.0e-4 | GIMAP8      | 8.17              | 11.574                      | 0.019 |
| POMP        | 22.789            | 38.113                      | 2.0e-4 | ADGRE3      | 19.059            | 1.359                       | 0.019 |
| TXNDC5      | 17.491            | 144.425                     | 2.1e-4 | H1FX        | 120.755           | 157.523                     | 0.019 |
| CAMP        | 8.114             | 2.003                       | 2.1e-4 | KCTD12      | 18.731            | 49.907                      | 0.019 |
| IGKV1-12    | 6.538             | 76.282                      | 2.2e-4 | C17orf107   | 2.608             | 0.544                       | 0.019 |
| HMMR        | 0.436             | 0.995                       | 2.2e-4 | DEC1        | 82.616            | 85.782                      | 0.019 |
| IGLV1-40    | 23.133            | 199.172                     | 2.2e-4 | ATP6VOA1    | 32.689            | 46.897                      | 0.019 |
| UTP4        | 4.081             | 1.076                       | 2.3e-4 | MUC6        | 1.561             | 0.422                       | 0.019 |
| IGHV2-5     | 9.698             | 178.482                     | 2.3e-4 | RSBN1       | 17.946            | 9.159                       | 0.019 |
| SIGLEC12    | 0.024             | 0.863                       | 2.3e-4 | SH3TC1      | 26.327            | 43.325                      | 0.019 |
| AK4         | 0.801             | 1.457                       | 2.3e-4 | KIF21B      | 36.339            | 12.97                       | 0.019 |
| SMIM15      | 6.013             | 10.92                       | 2.3e-4 | ARL10       | 11.715            | 9.395                       | 0.019 |
| NRXN2       | 0.739             | 0.078                       | 2.4e-4 | SND1        | 44.161            | 50.212                      | 0.019 |
| GLI1        | 5.371             | 1.794                       | 2.4e-4 | PDGFC       | 1.35              | 3.128                       | 0.019 |
| IGHV4-59    | 13.432            | 292.372                     | 2.4e-4 | FLOT1       | 17.044            | 4.781                       | 0.019 |
| CCSER2      | 30.537            | 16.238                      | 2.4e-4 | ODF3        | 0.359             | 0.101                       | 0.019 |
| ULK4P1      | 0.943             | 4.097                       | 2.5e-4 | MRPL36      | 11.324            | 17.538                      | 0.019 |
| IGKV3-11    | 30.006            | 440.476                     | 2.5e-4 | ARHGEF11    | 16.491            | 24.819                      | 0.019 |
| EPPK1       | 1.006             | 0.067                       | 2.6e-4 | HLA-DRA     | 0.042             | 1.465                       | 0.019 |
| EDARADD     | 2.113             | 0.473                       | 2.7e-4 | IGHGP       | 0.126             | 1.158                       | 0.019 |
| MAML1       | 7.321             | 9.598                       | 2.7e-4 | COX6A1      | 147.38            | 182.831                     | 0.019 |
| GALK1       | 9.636             | 17.642                      | 2.8e-4 | CSRP2       | 2.42              | 0.578                       | 0.019 |
| NDUFA7      | 25.592            | 40.209                      | 2.9e-4 | AGAP12P     | 1.01              | 0.365                       | 0.019 |
| RGS16       | 0.321             | 1.098                       | 2.9e-4 | SYTL5       | 0.05              | 0                           | 0.019 |
| TMED9       | 52.443            | 65.208                      | 2.9e-4 | SNTB1       | 13.527            | 16.444                      | 0.019 |
| SDHD        | 35.972            | 62.545                      | 2.9e-4 | KLRF1       | 71.087            | 18.956                      | 0.019 |
| CHRFAM7A    | 1.853             | 6.04                        | 2.9e-4 | ABI2        | 14.704            | 8.169                       | 0.019 |
| SLC39A1     | 14.504            | 19.651                      | 2.9e-4 | CKAP2L      | 0.444             | 0.67                        | 0.019 |
| YWHAE       | 0.198             | 4.563                       | 3.0e-4 | RPS27AP7    | 9.272             | 1.767                       | 0.019 |
| CLEC12B     | 6.295             | 33.52                       | 3.1e-4 | DAAM2       | 0.437             | 11.598                      | 0.019 |
| LAMTOR2     | 29.347            | 39.836                      | 3.1e-4 | FBN2        | 1.453             | 5.445                       | 0.019 |
| GAPDH       | 567.198           | 1392.836                    | 3.1e-4 | HTR7P1      | 0.732             | 1.02                        | 0.02  |
| SMIM10      | 0.137             | 0.728                       | 3.1e-4 | KIF19       | 3.729             | 0.7                         | 0.02  |
| KIF2C       | 0.7               | 1.972                       | 3.2e-4 | SLC9A3R1    | 143.21            | 52.958                      | 0.02  |
| ZFYVE28     | 34.109            | 8.595                       | 3.2e-4 | AL049757.1  | 0.576             | 0.122                       | 0.02  |
| ZNF365      | 4.749             | 0.806                       | 3.2e-4 | AGFG1       | 38.268            | 94.497                      | 0.02  |
| PTPRO       | 1.96              | 3.57                        | 3.2e-4 | FGFR1OP     | 28.664            | 10.716                      | 0.02  |
| RAB13       | 5.22              | 18.117                      | 3.3e-4 | IGHV2-70D   | 0                 | 2.526                       | 0.02  |
| ENPP5       | 2.434             | 0.624                       | 3.3e-4 | MICD        | 0.002             | 0.283                       | 0.02  |
| GRB10       | 6.375             | 30.667                      | 3.3e-4 | CNTNAP1     | 9.604             | 4.787                       | 0.02  |
| EFNA5       | 2.01              | 0.204                       | 3.3e-4 | SYK         | 40.607            | 75.105                      | 0.02  |
| OCRL        | 2.503             | 4.709                       | 3.3e-4 | CCNJ        | 5.169             | 6.157                       | 0.02  |
| NUBP1       | 15.046            | 21.749                      | 3.4e-4 | TMEM64      | 6.09              | 2.575                       | 0.02  |
| TTK         | 0.335             | 1.167                       | 3.4e-4 | UBE2L3      | 20.591            | 24.923                      | 0.02  |
| ARL4D       | 1.683             | 0.403                       | 3.4e-4 | ORC1        | 0.83              | 1.275                       | 0.02  |
| FRRS1       | 1.046             | 3.021                       | 3.5e-4 | BOD1L1      | 47.153            | 26.214                      | 0.02  |
| MAFG        | 9.305             | 19.09                       | 3.5e-4 | FBXL14      | 13.402            | 5.486                       | 0.02  |
| IGLC2       | 115.388           | 1972.762                    | 3.6e-4 | ANKRD36     | 18.738            | 6.793                       | 0.02  |
| PLEKHN1     | 0.355             | 0.874                       | 3.6e-4 | AL353662.1  | 8.566             | 0.679                       | 0.02  |
| ZWINT       | 0.835             | 4.267                       | 3.6e-4 | NEURL1      | 9.285             | 3.147                       | 0.02  |



**Table S1. Continuation**

| Gene Symbol  | Base Mean Control | Base Mean COVID-19 patients | P adj  | Gene Symbol | Base Mean Control | Base Mean COVID-19 patients | P adj |
|--------------|-------------------|-----------------------------|--------|-------------|-------------------|-----------------------------|-------|
| NKIRAS2      | 22.337            | 33.863                      | 3.7e-4 | AMOT        | 1.179             | 0.369                       | 0.02  |
| CDHR3        | 6.743             | 1.856                       | 3.7e-4 | EIF3I       | 76.205            | 79.877                      | 0.02  |
| MRPL53       | 18.297            | 37.785                      | 3.7e-4 | AAK1        | 82.221            | 37.492                      | 0.02  |
| DTL          | 0.255             | 1.79                        | 3.7e-4 | GATA2       | 17.607            | 1.577                       | 0.02  |
| NDUFAB1      | 23.115            | 33.819                      | 3.9e-4 | JADE2       | 49.552            | 21.799                      | 0.02  |
| GSTZ1        | 4.052             | 9.063                       | 3.9e-4 | PRELID1     | 83.98             | 126.277                     | 0.02  |
| TRDJ1        | 236.614           | 43.398                      | 3.9e-4 | SLC37A2     | 8.302             | 16.315                      | 0.02  |
| TMED7-TICAM2 | 1.469             | 2.548                       | 4.1e-4 | AGPAT3      | 36.136            | 44.896                      | 0.02  |
| IGKV1-33     | 12.041            | 290.495                     | 4.1e-4 | PIP5K1B     | 2.651             | 4.652                       | 0.021 |
| IGLL5        | 8.923             | 94.584                      | 4.2e-4 | ZBTB4       | 24.651            | 10.361                      | 0.021 |
| OAS1         | 30.022            | 87.206                      | 4.2e-4 | WNT10B      | 8.264             | 1.71                        | 0.021 |
| SIGLEC1      | 2.601             | 33.632                      | 4.2e-4 | CYP46A1     | 3.028             | 0.773                       | 0.021 |
| FAM72B       | 0.893             | 1.847                       | 4.2e-4 | CYTH1       | 233.83            | 112.474                     | 0.021 |
| PPT1         | 90.615            | 180.605                     | 4.2e-4 | HOMER1      | 0.498             | 0.201                       | 0.021 |
| CLDND2       | 26.719            | 6.855                       | 4.3e-4 | GNS         | 39.645            | 65.832                      | 0.021 |
| TMEM106A     | 7.846             | 14.455                      | 4.4e-4 | FCGR3A      | 195.521           | 56.354                      | 0.021 |
| ERLIN1       | 5.133             | 14.83                       | 4.4e-4 | TRGV9       | 3.726             | 1.193                       | 0.021 |
| PSMB7        | 74.346            | 108.318                     | 4.6e-4 | RCAN1       | 5.766             | 7.807                       | 0.021 |
| LHFPL2       | 5.233             | 16.222                      | 4.6e-4 | C9orf131    | 6.864             | 4.2                         | 0.021 |
| IGHG3        | 2.634             | 46.989                      | 4.7e-4 | NDUFV2      | 75.068            | 80.012                      | 0.021 |
| CYBRD1       | 11.899            | 20.996                      | 4.7e-4 | NSF         | 11.947            | 14.68                       | 0.021 |
| AC010970.1   | 24524.215         | 88.265                      | 4.7e-4 | MRPS18A     | 11.945            | 14.353                      | 0.021 |
| PSMD8        | 57.746            | 75.229                      | 4.7e-4 | TNFRSF10C   | 89.75             | 7.682                       | 0.021 |
| SLC16A14     | 0.125             | 0.544                       | 4.8e-4 | C10orf76    | 15.543            | 17.085                      | 0.021 |
| NAP1L2       | 1.382             | 0.291                       | 4.8e-4 | C16orf70    | 20.272            | 25.677                      | 0.021 |
| CIT          | 1.035             | 1.688                       | 4.9e-4 | HAVCR2      | 8.972             | 14.11                       | 0.021 |
| FAM129B      | 11.306            | 26.778                      | 4.9e-4 | PSMG2       | 34.37             | 38.765                      | 0.021 |
| YIF1A        | 17.84             | 21.283                      | 4.9e-4 | TMEM45B     | 5.086             | 1.201                       | 0.021 |
| LTA4H        | 84.631            | 165.748                     | 5.0e-4 | PAK6        | 2.185             | 0.739                       | 0.021 |
| CEP126       | 2.396             | 0.796                       | 5.0e-4 | CXCL1       | 9.774             | 0.798                       | 0.021 |
| TSPO         | 133.622           | 226.939                     | 5.0e-4 | C14orf28    | 2.178             | 0.978                       | 0.021 |
| ATP6V1F      | 87.921            | 133.048                     | 5.0e-4 | LHFPL6      | 0.204             | 1.101                       | 0.021 |
| NDUFV3       | 11.205            | 20.101                      | 5.1e-4 | AK5         | 14.058            | 4.04                        | 0.021 |
| AL365475.1   | 1.762             | 0.418                       | 5.1e-4 | ZNF213      | 3.443             | 4.41                        | 0.021 |
| RUNX3        | 178.694           | 49.61                       | 5.1e-4 | KLKB1       | 1.672             | 0.396                       | 0.021 |
| RPL9P9       | 40.697            | 6.401                       | 5.1e-4 | GBA         | 19.521            | 25.599                      | 0.021 |
| AC098679.2   | 0.769             | 2.722                       | 5.1e-4 | NFS1        | 7.379             | 9.422                       | 0.021 |
| GOS2         | 1159.159          | 59.155                      | 5.1e-4 | TPT1P12     | 4.62              | 0.618                       | 0.021 |
| CDK17        | 40.015            | 15.95                       | 5.2e-4 | TMEM70      | 8.863             | 18.861                      | 0.021 |
| TRGV4        | 23.05             | 6.311                       | 5.2e-4 | PREP        | 13.351            | 16.187                      | 0.021 |
| MGAT1        | 97.004            | 153.232                     | 5.2e-4 | PCMT1       | 31.372            | 39.135                      | 0.021 |
| ABCA5        | 26.172            | 11.283                      | 5.2e-4 | BAHCC1      | 1.452             | 4.357                       | 0.021 |
| CCL4         | 2.051             | 0.026                       | 5.3e-4 | MRPL58      | 8.911             | 13.92                       | 0.021 |
| IGLV3-10     | 4.443             | 200.73                      | 5.3e-4 | C21orf2     | 33.163            | 14.886                      | 0.021 |
| SLC35F3      | 0.43              | 0.062                       | 5.5e-4 | FEZ1        | 5.419             | 1.749                       | 0.021 |
| MDH2         | 52.356            | 57.565                      | 5.5e-4 | ARHGAP23    | 0.017             | 0.169                       | 0.021 |
| CCT5         | 60.45             | 93.661                      | 5.5e-4 | GSTA1       | 1.457             | 0.026                       | 0.021 |
| AC243791.2   | 6.025             | 1.97                        | 5.5e-4 | ICAM4       | 5.456             | 8.114                       | 0.021 |
| GHRL         | 9.462             | 3.346                       | 5.5e-4 | PLA2G6      | 68.403            | 29.461                      | 0.021 |
| TUBG1        | 5.491             | 9.095                       | 5.6e-4 | TBC1D19     | 3.513             | 1.082                       | 0.021 |
| NDUFS6       | 55.382            | 71.859                      | 5.6e-4 | NDUFS2      | 57.245            | 61.952                      | 0.022 |
| SORBS2       | 0.794             | 0.129                       | 5.7e-4 | LRRC8D      | 18.056            | 26.585                      | 0.022 |

**Table S1. Continuation**

| Gene Symbol | Base Mean Control | Base Mean COVID-19 patients | P adj  | Gene Symbol | Base Mean Control | Base Mean COVID-19 patients | P adj |
|-------------|-------------------|-----------------------------|--------|-------------|-------------------|-----------------------------|-------|
| NEUROD2     | 8.862             | 0.041                       | 5.8e-4 | THUMPD1     | 48.769            | 24.089                      | 0.022 |
| YWHAG       | 9.309             | 20.611                      | 5.8e-4 | AL031281.1  | 9.601             | 2.134                       | 0.022 |
| DOCK1       | 0.167             | 1.024                       | 5.8e-4 | POU3F2      | 0.101             | 0.001                       | 0.022 |
| RBFOX2      | 0.516             | 0.084                       | 5.8e-4 | SIRPD       | 2.242             | 8.047                       | 0.022 |
| ZNF366      | 0.609             | 2.899                       | 5.8e-4 | GAS6        | 5.604             | 7.403                       | 0.022 |
| KRT5        | 1.118             | 0.104                       | 5.9e-4 | BCL9L       | 88.114            | 26.879                      | 0.022 |
| AK2         | 46.211            | 65.948                      | 5.9e-4 | TMEM268     | 11.017            | 12.943                      | 0.022 |
| RPL26L1     | 9.439             | 16.039                      | 6.0e-4 | TXNDC11     | 31.018            | 35.683                      | 0.022 |
| CCNA2       | 1.153             | 2.416                       | 6.2e-4 | THSD7A      | 0.046             | 0.023                       | 0.022 |
| CORO6       | 2.417             | 0.689                       | 6.2e-4 | FAT2        | 0.279             | 0.377                       | 0.022 |
| PLEKHA1     | 23.337            | 9.759                       | 6.4e-4 | HMGCL       | 13.151            | 14.34                       | 0.022 |
| MLF1        | 5.527             | 1.698                       | 6.4e-4 | PFN2        | 3.169             | 1.291                       | 0.022 |
| TPST1       | 6.259             | 45.959                      | 6.4e-4 | SSR1        | 45.852            | 68.427                      | 0.022 |
| IGLV3-19    | 18.587            | 111.861                     | 6.4e-4 | IGHV1-46    | 3.702             | 46.692                      | 0.022 |
| IGLV9-49    | 1.214             | 17.696                      | 6.4e-4 | PTRHD1      | 14.563            | 19.264                      | 0.022 |
| LRRC43      | 2.802             | 0.632                       | 6.5e-4 | TKTL1       | 9.963             | 1.508                       | 0.022 |
| HDLBP       | 74.087            | 108.822                     | 6.5e-4 | DNAJC15     | 4.506             | 9.074                       | 0.022 |
| AL359976.1  | 1.238             | 0.013                       | 6.5e-4 | RCC2        | 25.588            | 28.333                      | 0.022 |
| SHROOM1     | 1.124             | 7.057                       | 6.5e-4 | CXorf65     | 29.62             | 12.668                      | 0.022 |
| KIAA0930    | 31.821            | 55.978                      | 6.6e-4 | SLIRP       | 37.4              | 55.846                      | 0.022 |
| DMPK        | 23.148            | 8.847                       | 6.6e-4 | KAT6B       | 12.965            | 5.583                       | 0.022 |
| SPAG5       | 7.855             | 11.063                      | 6.6e-4 | FAM35BP     | 0.222             | 0.594                       | 0.022 |
| EEF1A1P3    | 2.721             | 0.366                       | 6.7e-4 | DEPP1       | 2.58              | 6.058                       | 0.022 |
| NEO1        | 3.346             | 1.78                        | 6.8e-4 | ADAM23      | 1.965             | 0.639                       | 0.022 |
| CNOT6L      | 47.983            | 23.057                      | 6.8e-4 | HLA-DPB2    | 0.497             | 0.01                        | 0.022 |
| XIAPP3      | 6.773             | 1.439                       | 6.8e-4 | CCT6A       | 44.79             | 51.272                      | 0.023 |
| NDUFAF3     | 23.027            | 31.789                      | 6.8e-4 | ASNA1       | 35.905            | 48.259                      | 0.023 |
| NUF2        | 1.231             | 3.71                        | 6.9e-4 | CTNND1      | 18.523            | 16.668                      | 0.023 |
| A2MP1       | 9.116             | 1.14                        | 6.9e-4 | SLC25A5     | 119.353           | 167.841                     | 0.023 |
| ORMDL2      | 12.916            | 16.2                        | 6.9e-4 | TMIE        | 0.624             | 0.1                         | 0.023 |
| ALOX15      | 1.057             | 0.092                       | 6.9e-4 | LAIR1       | 7.142             | 16.117                      | 0.023 |
| RRAS        | 13.784            | 20.881                      | 6.9e-4 | IGHV4-4     | 4.65              | 45.86                       | 0.023 |
| NDUFB5      | 26.726            | 43.303                      | 7.0e-4 | WWC2        | 1.836             | 3.044                       | 0.023 |
| VPS25       | 20.628            | 25.9                        | 7.0e-4 | CTNNA1      | 45.401            | 55.944                      | 0.023 |
| KMT2E       | 90.188            | 45.342                      | 7.0e-4 | SRGAP2      | 35.145            | 64.624                      | 0.023 |
| C1orf21     | 22.397            | 4.973                       | 7.0e-4 | SPEF2       | 7.965             | 2.65                        | 0.023 |
| ST14        | 7.23              | 27.182                      | 7.0e-4 | MCM2        | 2.637             | 4.922                       | 0.023 |
| E2F7        | 0.218             | 0.371                       | 7.0e-4 | UBQLN1      | 59.652            | 70.287                      | 0.023 |
| AL161672.1  | 1.322             | 0.038                       | 7.2e-4 | BFSP1       | 2.297             | 0.538                       | 0.023 |
| UQCRC1      | 84.316            | 99.412                      | 7.2e-4 | SLC27A3     | 24.91             | 37.129                      | 0.023 |
| IL18        | 6.095             | 23.818                      | 7.4e-4 | SKAP1       | 57.487            | 15.804                      | 0.023 |
| YIF1B       | 29.598            | 44.26                       | 7.7e-4 | GEMIN7      | 19.203            | 30.588                      | 0.023 |
| AC117382.1  | 2.605             | 0.145                       | 7.7e-4 | DENND1A     | 19.912            | 26.296                      | 0.023 |
| HADHA       | 64.038            | 92.274                      | 7.8e-4 | MAF         | 17.983            | 4.6                         | 0.023 |
| SYN2        | 0.035             | 0.749                       | 7.8e-4 | SLC2A9      | 7.745             | 12.806                      | 0.023 |
| AUTS2       | 33.762            | 8.024                       | 7.8e-4 | IGHG4       | 1.465             | 19.654                      | 0.023 |
| AC008750.8  | 6.465             | 1.522                       | 8.1e-4 | TEDC2       | 0.144             | 0.726                       | 0.023 |
| SCARB2      | 20.233            | 33.032                      | 8.1e-4 | CCDC171     | 1.982             | 0.833                       | 0.023 |
| SLC4A4      | 1.377             | 0.315                       | 8.2e-4 | CD40LG      | 7.373             | 2.258                       | 0.023 |
| DUSP7       | 6.129             | 9.024                       | 8.3e-4 | DYM         | 26.036            | 29.356                      | 0.023 |
| PSMA6       | 84.267            | 132.371                     | 8.3e-4 | RXFP2       | 0.404             | 1.971                       | 0.023 |
| PEPD        | 25.481            | 37.453                      | 8.3e-4 | ZNF100      | 7.263             | 8.856                       | 0.023 |

**Table S1. Continuation**

| Gene Symbol | Base Mean Control | Base Mean COVID-19 patients | P adj  | Gene Symbol | Base Mean Control | Base Mean COVID-19 patients | P adj |
|-------------|-------------------|-----------------------------|--------|-------------|-------------------|-----------------------------|-------|
| PGM2        | 9.843             | 18.392                      | 8.3e-4 | HTN1        | 2.164             | 0.896                       | 0.023 |
| BCAT1       | 2.178             | 5.867                       | 8.3e-4 | ATP5F1A     | 116.061           | 143.302                     | 0.023 |
| CERS6       | 5.204             | 8.893                       | 8.3e-4 | CD101       | 13.095            | 13.947                      | 0.023 |
| NLN         | 3.727             | 7.601                       | 8.4e-4 | FAT4        | 0.295             | 0.057                       | 0.023 |
| XXYLT1      | 5.093             | 7.149                       | 8.4e-4 | HCAR2       | 30.06             | 2                           | 0.023 |
| ICAM5       | 0.393             | 1.227                       | 8.5e-4 | YPEL4       | 0.844             | 2.811                       | 0.023 |
| FAM131B     | 1.091             | 0.322                       | 8.5e-4 | ME2         | 28.175            | 33.053                      | 0.023 |
| ZNF831      | 9.935             | 2.333                       | 8.5e-4 | FSTL3       | 3.9               | 7.028                       | 0.023 |
| FZD5        | 0.235             | 0.693                       | 8.7e-4 | ASNS        | 28.924            | 11.96                       | 0.023 |
| AIMP2       | 4.679             | 8.535                       | 8.9e-4 | SARDH       | 2.412             | 0.593                       | 0.023 |
| SEC11A      | 70.835            | 108.731                     | 8.9e-4 | TRAFF1      | 19.781            | 21.047                      | 0.024 |
| PRDM1       | 23.934            | 36.355                      | 8.9e-4 | RASSF7      | 15.992            | 4.734                       | 0.024 |
| IGLV10-54   | 2.312             | 30.102                      | 8.9e-4 | CXCR1       | 36.322            | 2.708                       | 0.024 |
| GLMP        | 17.308            | 24.5                        | 8.9e-4 | XRCC4       | 2.97              | 4.595                       | 0.024 |
| TRAV10      | 8.107             | 1.245                       | 9.0e-4 | KIF5C       | 1.449             | 0.486                       | 0.024 |
| BMI1        | 59.111            | 27.816                      | 9.1e-4 | TPBGL       | 0.241             | 0.042                       | 0.024 |
| FGF9        | 0.891             | 0.357                       | 9.1e-4 | PRDM9       | 1.956             | 0.444                       | 0.024 |
| PKMYT1      | 1.244             | 3.729                       | 9.1e-4 | TTC9        | 5.304             | 1.813                       | 0.024 |
| ANXA2       | 156.842           | 354.216                     | 9.2e-4 | ATP6V1E1    | 41.605            | 51.266                      | 0.024 |
| TOMM22      | 27.733            | 37.897                      | 9.4e-4 | GPR183      | 49.381            | 20.829                      | 0.024 |
| ATP5MC3     | 56.352            | 91.447                      | 9.8e-4 | MPV17       | 48.413            | 58.088                      | 0.024 |
| HTRA1       | 0.947             | 11.344                      | 9.8e-4 | SCAND2P     | 10.819            | 9.321                       | 0.024 |
| PHF24       | 0.365             | 0.037                       | 0.001  | TPCN2       | 11.486            | 17.021                      | 0.024 |
| ROGDI       | 19.782            | 38.15                       | 0.001  | NMUR1       | 11.494            | 3.111                       | 0.024 |
| ATXN10      | 34.742            | 37.797                      | 0.001  | MYO7A       | 2.491             | 9.024                       | 0.024 |
| COPZ1       | 49.878            | 75.115                      | 0.001  | PURA        | 10.278            | 3.678                       | 0.024 |
| C16orf54    | 87.857            | 28.771                      | 0.001  | HDAC9       | 9.826             | 29.919                      | 0.024 |
| PKM         | 240.791           | 390.282                     | 0.001  | LMAN2       | 80.08             | 99.904                      | 0.024 |
| SLC38A7     | 6.689             | 10.325                      | 0.001  | MYO3B       | 0.758             | 0.181                       | 0.024 |
| CXCL10      | 0.601             | 5.724                       | 0.001  | NRM         | 12.888            | 17.475                      | 0.024 |
| NPM1P40     | 3.987             | 0.094                       | 0.001  | PSMD5       | 19.554            | 17.873                      | 0.024 |
| HNRNPA1P34  | 1.68              | 0.111                       | 0.001  | FBXO33      | 36.4              | 14.31                       | 0.024 |
| RASGEF1B    | 15.391            | 26.657                      | 0.001  | IGLV8-61    | 0.545             | 61.747                      | 0.024 |
| ELOVL3      | 0.138             | 0.946                       | 0.001  | TMEM63C     | 2.712             | 0.653                       | 0.024 |
| CLTA        | 30.761            | 51.674                      | 0.001  | DUSP3       | 10.86             | 18.586                      | 0.024 |
| SUCLG1      | 44.244            | 48.778                      | 0.001  | HLX         | 5.116             | 12.932                      | 0.024 |
| GATA3       | 35.821            | 6.742                       | 0.001  | DCTN2       | 64.352            | 66.697                      | 0.024 |
| GSTO1       | 47.353            | 84.371                      | 0.001  | CD1D        | 11.419            | 32.143                      | 0.025 |
| SELENON     | 13.33             | 15.612                      | 0.001  | SLC3A2      | 74.843            | 90.429                      | 0.025 |
| AGAP7P      | 7.04              | 0.661                       | 0.001  | AGBL3       | 7.33              | 1.405                       | 0.025 |
| S1PR5       | 35.304            | 7.924                       | 0.001  | HAUS1       | 12.312            | 14.689                      | 0.025 |
| TMEM208     | 15.336            | 20.647                      | 0.001  | USP51       | 0.447             | 0.124                       | 0.025 |
| IGKV1-27    | 6.108             | 49.152                      | 0.001  | SERPINB9    | 15.129            | 16.481                      | 0.025 |
| ZNF574      | 6.935             | 2.654                       | 0.001  | RNASE6      | 34.212            | 114.772                     | 0.025 |
| SYNE3       | 13.145            | 18.006                      | 0.001  | MGST2       | 12.919            | 27.321                      | 0.025 |
| BATF2       | 0.303             | 1.083                       | 0.001  | CD300C      | 9.615             | 22.551                      | 0.025 |
| AMPH        | 1.919             | 11.111                      | 0.001  | SMIM27      | 22.11             | 11.652                      | 0.025 |
| IL7R        | 144.8             | 47.629                      | 0.001  | RAB10       | 30.871            | 45.439                      | 0.025 |
| KCNQ1       | 14.706            | 24.634                      | 0.001  | EID3        | 5.052             | 1.665                       | 0.025 |
| UACA        | 1.938             | 8.319                       | 0.001  | PTPN4       | 53.234            | 23.958                      | 0.025 |
| MERTK       | 1.877             | 7.45                        | 0.001  | TUBB4A      | 3.009             | 0.788                       | 0.025 |
| ZNF830      | 11.305            | 3.381                       | 0.001  | TM9SF1      | 9.467             | 11.393                      | 0.025 |

**Table S1. Continuation**

| Gene Symbol | Base Mean Control | Base Mean COVID-19 patients | P adj | Gene Symbol | Base Mean Control | Base Mean COVID-19 patients | P adj |
|-------------|-------------------|-----------------------------|-------|-------------|-------------------|-----------------------------|-------|
| AMZ2P2      | 1.673             | 0.094                       | 0.001 | CAPN2       | 165.42            | 169.671                     | 0.025 |
| CCR9        | 3.653             | 0.76                        | 0.001 | IRAK3       | 19.739            | 64.447                      | 0.025 |
| RNH1        | 77.042            | 100.76                      | 0.001 | SLFN12      | 8.507             | 13.524                      | 0.026 |
| AC244157.2  | 1.618             | 0.101                       | 0.001 | ZCCHC18     | 6.671             | 2.395                       | 0.026 |
| HLA-DRB4    | 0.075             | 128.485                     | 0.001 | NDUFA8      | 10.079            | 17.384                      | 0.026 |
| IGHV4-34    | 16.724            | 135.488                     | 0.001 | GAS1        | 0.418             | 0.052                       | 0.026 |
| SPRY2       | 0.566             | 6.215                       | 0.001 | CD34        | 0.386             | 0.085                       | 0.026 |
| CDKN3       | 1.871             | 3.732                       | 0.001 | PGBD2       | 5.465             | 2.884                       | 0.026 |
| HOXA9       | 0.308             | 1.767                       | 0.001 | C20orf27    | 18.178            | 32.316                      | 0.026 |
| IGLV3-21    | 7.229             | 151.026                     | 0.001 | MT1JP       | 0.213             | 0.422                       | 0.026 |
| SQOR        | 29.501            | 52.781                      | 0.001 | MYL5        | 13.758            | 18.597                      | 0.026 |
| HLA-DQB1    | 0.048             | 17.076                      | 0.001 | H2AFJ       | 30.037            | 55.999                      | 0.026 |
| TMTC2       | 3.549             | 9.376                       | 0.001 | EXPH5       | 0.665             | 0.252                       | 0.026 |
| PSMA7       | 125.462           | 161.044                     | 0.001 | MPG         | 19.643            | 20.799                      | 0.026 |
| AC090519.1  | 1.392             | 0.163                       | 0.001 | NIFKP6      | 4.103             | 0.758                       | 0.026 |
| RPL7P32     | 3.042             | 0.262                       | 0.001 | TALDO1      | 170.304           | 269.245                     | 0.026 |
| AURKA       | 0.849             | 1.468                       | 0.001 | SPAG17      | 0.348             | 1.033                       | 0.026 |
| ACTG1       | 691.362           | 963.251                     | 0.001 | DEPDC1B     | 2.126             | 1.916                       | 0.026 |
| EIF4G1      | 84.261            | 107.042                     | 0.001 | WNT1        | 3.347             | 0.772                       | 0.026 |
| IGHV3-15    | 11.858            | 167.601                     | 0.001 | DNAH8       | 0.081             | 0.306                       | 0.026 |
| NECTIN2     | 2.541             | 7.372                       | 0.001 | TOR3A       | 27.821            | 31.002                      | 0.026 |
| TMEM38A     | 1.264             | 4.537                       | 0.001 | ACSS2       | 29.923            | 33.27                       | 0.026 |
| A2M         | 48.706            | 2.874                       | 0.001 | AC244394.1  | 0.67              | 0.083                       | 0.026 |
| KIF21A      | 9.815             | 2.08                        | 0.001 | SCAMP2      | 47.258            | 53.976                      | 0.026 |
| ARL4C       | 119.758           | 30.236                      | 0.001 | NIPA2       | 24.541            | 27.037                      | 0.026 |
| CXCR2       | 129.932           | 6.956                       | 0.001 | C17orf58    | 1.096             | 1.682                       | 0.026 |
| SH2D2A      | 42.047            | 9.538                       | 0.001 | RAPSN       | 1.634             | 0.515                       | 0.026 |
| TBC1D2      | 7.434             | 20.741                      | 0.001 | AC242308.2  | 2.505             | 0.807                       | 0.026 |
| FH          | 9.9               | 16.342                      | 0.001 | SIAH2       | 23.127            | 81.109                      | 0.026 |
| CARD6       | 1.954             | 3.085                       | 0.001 | MFGE8       | 27.009            | 92.185                      | 0.026 |
| FLOT1       | 0.293             | 3.151                       | 0.001 | HM13        | 102.188           | 108.014                     | 0.027 |
| FIBP        | 25.219            | 31.65                       | 0.001 | LILRB4      | 2.83              | 10.238                      | 0.027 |
| MAP3K6      | 8.049             | 8.474                       | 0.002 | ARHGAP24    | 7.257             | 21.836                      | 0.027 |
| NAA20       | 24.26             | 28.609                      | 0.002 | LILRA2      | 1.634             | 4.381                       | 0.027 |
| AKR1A1      | 38.189            | 52.666                      | 0.002 | GZMM        | 107.07            | 26.692                      | 0.027 |
| COX8A       | 193.042           | 271.74                      | 0.002 | SPNS1       | 37.488            | 38.66                       | 0.027 |
| LIM2        | 4.986             | 0.691                       | 0.002 | MAP1LC3B2   | 13.116            | 1.772                       | 0.027 |
| TP53I3      | 5.605             | 14.735                      | 0.002 | SPATS2L     | 4.369             | 7.475                       | 0.027 |
| ESRP2       | 5.805             | 0.864                       | 0.002 | KANSL1      | 19.054            | 20.663                      | 0.027 |
| AJAP1       | 0.259             | 0.035                       | 0.002 | LAIR1       | 1.617             | 24.691                      | 0.027 |
| MRPL18      | 16.541            | 23.51                       | 0.002 | NLGN3       | 2.499             | 0.92                        | 0.027 |
| TOB1        | 120.456           | 53.598                      | 0.002 | AP1S1       | 8.322             | 11.843                      | 0.027 |
| NDUFAF1     | 4.155             | 7.735                       | 0.002 | IDE         | 12.108            | 13.207                      | 0.027 |
| ACAA2       | 22.063            | 27.381                      | 0.002 | FOXP1       | 65.649            | 34.503                      | 0.027 |
| FCRL6       | 93.894            | 18.711                      | 0.002 | TSPAN2      | 19.822            | 5.488                       | 0.027 |
| IGHV4-28    | 0.484             | 10.01                       | 0.002 | DOK1        | 13.915            | 19.676                      | 0.027 |
| IGHV3-49    | 7.152             | 100.193                     | 0.002 | COX5B       | 102.564           | 111.67                      | 0.027 |
| VAMP8       | 112.79            | 151.03                      | 0.002 | MAP2K1      | 32.799            | 52.598                      | 0.027 |
| MZB1        | 8.388             | 89.416                      | 0.002 | AHCYL1      | 18.845            | 22.572                      | 0.027 |
| CLDN24      | 1.212             | 0.055                       | 0.002 | LDLRAD3     | 2.104             | 7.369                       | 0.028 |
| OTOF        | 0.816             | 6.768                       | 0.002 | C1orf146    | 1.255             | 0.34                        | 0.028 |
| CDC48       | 0.801             | 1.624                       | 0.002 | CTSA        | 109.974           | 202.268                     | 0.028 |

**Table S1. Continuation**

| Gene Symbol | Base Mean Control | Base Mean COVID-19 patients | P adj | Gene Symbol | Base Mean Control | Base Mean COVID-19 patients | P adj |
|-------------|-------------------|-----------------------------|-------|-------------|-------------------|-----------------------------|-------|
| B4GALNT3    | 0.862             | 0.221                       | 0.002 | CYFIP1      | 3.437             | 8.405                       | 0.028 |
| RBBP8       | 4.291             | 5.961                       | 0.002 | RPL5P23     | 1.332             | 0.263                       | 0.028 |
| TM4SF19     | 5.398             | 1.471                       | 0.002 | TRAPPC2     | 15.218            | 8.3                         | 0.028 |
| SIL1        | 10.877            | 15.19                       | 0.002 | CD99L2      | 10.664            | 11.832                      | 0.028 |
| IGHJ5       | 100.564           | 1219.486                    | 0.002 | SLC38A10    | 50.255            | 59.506                      | 0.028 |
| CYP2D6      | 2.624             | 0.096                       | 0.002 | ZBTB22      | 2.975             | 0.519                       | 0.028 |
| FGFRL1      | 17.46             | 4.938                       | 0.002 | TVP23C-     |                   |                             |       |
| ZNF600      | 31.853            | 8.638                       | 0.002 | CDRT4       | 0.623             | 0.792                       | 0.028 |
| NEXMIF      | 0.162             | 0.058                       | 0.002 | HCFC1       | 15.312            | 16.127                      | 0.028 |
| RAB11FIP5   | 8.603             | 2.139                       | 0.002 | ERLIN2      | 10.541            | 11.742                      | 0.028 |
| TIMMDC1     | 21.864            | 25.814                      | 0.002 | ADRM1       | 44.526            | 48.94                       | 0.028 |
| FP565260.7  | 11.342            | 4.246                       | 0.002 | ATP23       | 3.857             | 6.756                       | 0.028 |
| ARPC1B      | 309.005           | 488.473                     | 0.002 | COMMD10     | 17.131            | 18.354                      | 0.028 |
| FUCA2       | 14.027            | 25.334                      | 0.002 | BMP4        | 0.495             | 0.016                       | 0.028 |
| EFTUD2      | 66.432            | 77.912                      | 0.002 | GOLGA6L5P   | 10.044            | 3.155                       | 0.028 |
| ESR2        | 5.397             | 1.645                       | 0.002 | ATP1B3      | 64.755            | 63.753                      | 0.028 |
| KPTN        | 4.901             | 6.276                       | 0.002 | CDC42SE2    | 90.404            | 39.727                      | 0.028 |
| FAM198B     | 7.296             | 36.135                      | 0.002 | ACTB        | 1985.03           | 2506.363                    | 0.028 |
| STUM        | 3.699             | 0.082                       | 0.002 | SYCE1L      | 9.463             | 2.841                       | 0.028 |
| PLCL1       | 4.889             | 1.516                       | 0.002 | CTSH        | 105.783           | 196.991                     | 0.028 |
| HLA-L       | 0.027             | 0.408                       | 0.002 | WNT3        | 0.287             | 0.051                       | 0.028 |
| ATP5F1C     | 78.073            | 119.313                     | 0.002 | RD3L        | 0                 | 0.218                       | 0.028 |
| ALCAM       | 5.44              | 13.376                      | 0.002 | CFTR        | 19.666            | 6.226                       | 0.028 |
| NOL3        | 4.122             | 10.423                      | 0.002 | ZNF573      | 15.674            | 6.95                        | 0.028 |
| AC138969.2  | 0.005             | 0.118                       | 0.002 | SBK1        | 12.282            | 2.961                       | 0.028 |
| PBXIP1      | 203.08            | 67.97                       | 0.002 | SYNE1       | 123.097           | 38.086                      | 0.028 |
| THOC6       | 13.85             | 18.003                      | 0.002 | ACOX2       | 0.338             | 0.824                       | 0.028 |
| IGHV3-6     | 0.441             | 9.442                       | 0.002 | CCDC7       | 8.588             | 2.993                       | 0.028 |
| MRPL28      | 26.275            | 34.601                      | 0.002 | RNF216      | 36.484            | 15.643                      | 0.028 |
| LRFN2       | 0.542             | 0.058                       | 0.002 | C4orf50     | 0.558             | 0.185                       | 0.028 |
| G6PC3       | 10.251            | 14.772                      | 0.002 | AIFM1       | 10.28             | 12.278                      | 0.028 |
| BLVRA       | 27.252            | 53.242                      | 0.002 | AC068831.7  | 2.223             | 2.651                       | 0.028 |
| NDUFS4      | 20.209            | 32.188                      | 0.002 | SMAD7       | 36.805            | 10.546                      | 0.028 |
| MPP6        | 4.781             | 1.744                       | 0.002 | PTBP1       | 109.567           | 110.317                     | 0.028 |
| RNF165      | 2.997             | 0.847                       | 0.002 | ZC3H12B     | 1.164             | 0.592                       | 0.028 |
| TNFRSF17    | 0.711             | 10.837                      | 0.002 | RAB44       | 3.7               | 10.636                      | 0.029 |
| AC234301.1  | 1.761             | 30.044                      | 0.002 | DDHD2       | 52.248            | 25.412                      | 0.029 |
| SDC4        | 1.38              | 6.75                        | 0.002 | SH3RF1      | 0.701             | 1.203                       | 0.029 |
| UBE2E1      | 52.322            | 65.381                      | 0.002 | AC011295.2  | 0.811             | 0.293                       | 0.029 |
| AC245056.4  | 0.251             | 4.784                       | 0.002 | ERP44       | 14.043            | 17.647                      | 0.029 |
| NET1        | 3.186             | 9.546                       | 0.002 | MDC1        | 1.369             | 0.116                       | 0.029 |
| IGKV4-1     | 23.648            | 370.069                     | 0.002 | IGKV1-37    | 0.415             | 13.4                        | 0.029 |
| CYFIP1      | 10.01             | 25.248                      | 0.002 | TM9SF4      | 25.294            | 29.964                      | 0.029 |
| WASHC5      | 20.263            | 22.179                      | 0.002 | PPP1CC      | 85.265            | 108.017                     | 0.029 |
| STAC3       | 8.361             | 17.863                      | 0.002 | CHCHD4      | 3.138             | 4.357                       | 0.029 |
| PUF60       | 28.742            | 31.374                      | 0.002 | ZNF568      | 9.448             | 3.873                       | 0.029 |
| ANG         | 3.177             | 12.42                       | 0.002 | COPS3       | 43.003            | 63.774                      | 0.029 |
| HADHB       | 42.443            | 70.589                      | 0.002 | KBTBD6      | 1.893             | 0.77                        | 0.029 |
| CBX4        | 93.65             | 39.65                       | 0.002 | KPNA5       | 11.239            | 4.88                        | 0.029 |
| CAPNS1      | 274.406           | 473.047                     | 0.002 | DIAPH3      | 0.18              | 0.324                       | 0.029 |
| CCDC136     | 10.49             | 3.742                       | 0.002 | GRIP1       | 4.603             | 0.643                       | 0.029 |
|             |                   |                             |       | FKBP9       | 8.303             | 6.973                       | 0.029 |

**Table S1. Continuation**

| Gene Symbol | Base Mean Control | Base Mean COVID-19 patients | P adj | Gene Symbol | Base Mean Control | Base Mean COVID-19 patients | P adj |
|-------------|-------------------|-----------------------------|-------|-------------|-------------------|-----------------------------|-------|
| MCM10       | 0.464             | 1.047                       | 0.002 | CCL28       | 6.963             | 3.005                       | 0.029 |
| CUEDC2      | 21.477            | 26.571                      | 0.002 | FAM72C      | 0.278             | 0.768                       | 0.029 |
| CCT8        | 58.648            | 80.252                      | 0.002 | IPO7        | 18.298            | 17.122                      | 0.029 |
| AGPAT2      | 15.66             | 28.891                      | 0.002 | TRGV3       | 15.144            | 5.421                       | 0.029 |
| CAPG        | 52.43             | 121.274                     | 0.002 | PSMB5       | 10.162            | 12.166                      | 0.029 |
| FAM72A      | 2.924             | 9.064                       | 0.002 | ZDHHC11     | 7.131             | 2.07                        | 0.029 |
| C14orf119   | 8.142             | 11.805                      | 0.002 | TRDV2       | 7.178             | 1.155                       | 0.029 |
| FKBP5       | 23.493            | 110.233                     | 0.002 | CASP1       | 106.02            | 162.486                     | 0.029 |
| RHOXF1P1    | 1.037             | 0.016                       | 0.002 | EBI3        | 0.409             | 1.871                       | 0.03  |
| C1GALT1C1   | 4.692             | 6.2                         | 0.002 | NDUFC2      | 60.745            | 71.418                      | 0.03  |
| PSMA2       | 35.753            | 43.029                      | 0.002 | AC079781.1  | 10.4              | 3.417                       | 0.03  |
| PPP2R5C     | 393.623           | 154.629                     | 0.002 | ADGRF1      | 3.298             | 0.668                       | 0.03  |
| LILRB5      | 0.226             | 1.54                        | 0.002 | POLD3       | 8.412             | 9.624                       | 0.03  |
| PDSS1       | 5.552             | 8.669                       | 0.002 | PGGHG       | 162.242           | 47.471                      | 0.03  |
| SLC16A1     | 4.564             | 5.683                       | 0.002 | SP4         | 7.907             | 3.215                       | 0.03  |
| ASGR2       | 11.975            | 52.723                      | 0.002 | PRR5L       | 122.129           | 25.39                       | 0.03  |
| GPM6A       | 1.918             | 0.204                       | 0.002 | P2RX7       | 8.394             | 14.07                       | 0.03  |
| SNX3        | 80.877            | 124.572                     | 0.002 | IFITM4P     | 0.079             | 0.946                       | 0.03  |
| LILRB4      | 0.08              | 3.073                       | 0.002 | HDC         | 47.382            | 0.831                       | 0.03  |
| MIB2        | 121.344           | 43.502                      | 0.002 | SEMA3G      | 0.281             | 0.441                       | 0.03  |
| COL6A2      | 26.606            | 7.609                       | 0.002 | ERH         | 55.206            | 53.351                      | 0.03  |
| NAP1L5      | 6.528             | 2.574                       | 0.002 | ASPH        | 15.45             | 36.309                      | 0.03  |
| SH2D1B      | 17.658            | 4.591                       | 0.002 | LTA         | 3.634             | 1.007                       | 0.03  |
| CHCHD1      | 6.902             | 11.704                      | 0.002 | PGLS        | 54.387            | 59.239                      | 0.03  |
| ADAP2       | 7.502             | 22.094                      | 0.002 | FOXP2       | 22.553            | 29.423                      | 0.03  |
| ABCB1       | 10.015            | 3.498                       | 0.002 | IFI35       | 32.781            | 44.361                      | 0.03  |
| RAB11FIP4   | 22.332            | 8.673                       | 0.002 | NLRP3       | 17.538            | 40.69                       | 0.03  |
| NDUFS7      | 36.318            | 53.218                      | 0.002 | PKD2L2      | 2.136             | 0.862                       | 0.03  |
| B4GALNT4    | 1.807             | 0.18                        | 0.002 | ZNF461      | 8.518             | 4.27                        | 0.03  |
| CDK1        | 1.234             | 2.73                        | 0.002 | PIGS        | 36.844            | 36.342                      | 0.031 |
| SAP30       | 8.292             | 41.19                       | 0.002 | TRAV12-1    | 26.687            | 5.523                       | 0.031 |
| MTERF2      | 10.333            | 2.763                       | 0.002 | APOLD1      | 4.64              | 1.31                        | 0.031 |
| PLA2G15     | 7.516             | 11.147                      | 0.002 | GANC        | 18.738            | 28.705                      | 0.031 |
| FGD2        | 31.437            | 88.512                      | 0.002 | CSTB        | 22.313            | 33.68                       | 0.031 |
| OPLAH       | 1.208             | 2.758                       | 0.002 | AKIP1       | 4.92              | 7.659                       | 0.031 |
| LPL         | 0.518             | 8.375                       | 0.002 | ATP6AP2     | 105.293           | 159.579                     | 0.031 |
| COL13A1     | 1.961             | 0.125                       | 0.002 | PRG4        | 0.318             | 0.083                       | 0.031 |
| ZNF330      | 34.656            | 52.093                      | 0.002 | GMDS        | 8.911             | 10.837                      | 0.031 |
| FOPNL       | 5.693             | 8.332                       | 0.002 | PDHB        | 18.458            | 26.708                      | 0.031 |
| MS4A4A      | 4.532             | 20.076                      | 0.002 | POLDIP3     | 30.787            | 33.716                      | 0.031 |
| CLCN7       | 70.864            | 101.753                     | 0.002 | DOK2        | 98.828            | 102.053                     | 0.031 |
| GPNMB       | 0.784             | 2.383                       | 0.002 | INSR        | 3.133             | 7.836                       | 0.031 |
| ANXA7       | 46.018            | 56.757                      | 0.002 | PAIP1P1     | 0                 | 0.617                       | 0.031 |
| FAM89A      | 1.322             | 3.827                       | 0.003 | ITGB2       | 598.044           | 750.124                     | 0.031 |
| C3orf22     | 0.01              | 0.294                       | 0.003 | C14orf132   | 0.795             | 0.175                       | 0.031 |
| SMAD1       | 1.235             | 5.361                       | 0.003 | IL1R2       | 29.333            | 497.885                     | 0.031 |
| CD1A        | 0.441             | 1.281                       | 0.003 | KCNC4       | 6.535             | 6.118                       | 0.032 |
| PYCR1       | 0.539             | 1.891                       | 0.003 | CCR1        | 7.54              | 17.197                      | 0.032 |
| FBXO32      | 23.637            | 9.514                       | 0.003 | NFATC3      | 51.822            | 25.63                       | 0.032 |
| ZDHHC20P1   | 0                 | 1.292                       | 0.003 | SLC4A2      | 38.782            | 36.209                      | 0.032 |
| IGKV1-6     | 2.022             | 16.435                      | 0.003 | NSDHL       | 4.04              | 4.876                       | 0.032 |
| DHRS4       | 18.25             | 25.589                      | 0.003 | LRMDA       | 9.261             | 11.68                       | 0.032 |

**Table S1. Continuation**

| Gene Symbol | Base Mean Control | Base Mean COVID-19 patients | P adj | Gene Symbol | Base Mean Control | Base Mean COVID-19 patients | P adj |
|-------------|-------------------|-----------------------------|-------|-------------|-------------------|-----------------------------|-------|
| CCL4L2      | 1.152             | 0.056                       | 0.003 | ZNF165      | 0.767             | 0.252                       | 0.032 |
| MGAT4A      | 57.135            | 26.022                      | 0.003 | OR1H1P      | 0.563             | 0.017                       | 0.032 |
| PLP2        | 135.102           | 213.207                     | 0.003 | NFATC2      | 23.121            | 7.103                       | 0.032 |
| SEC23B      | 14.488            | 22.508                      | 0.003 | CCL5        | 474.12            | 131.801                     | 0.032 |
| TNXB        | 3.561             | 2.56                        | 0.003 | FGD4        | 8.67              | 22.059                      | 0.032 |
| GSC         | 0.723             | 0.016                       | 0.003 | SLC4A7      | 30.792            | 12.001                      | 0.032 |
| NTN4        | 1.628             | 0.141                       | 0.003 | AC010463.1  | 0.175             | 0                           | 0.032 |
| DYNLL1      | 67.898            | 112.811                     | 0.003 | SPTSSA      | 5.108             | 7.701                       | 0.032 |
| TNRC6B      | 55.748            | 19.155                      | 0.003 | NAP1L3      | 1.466             | 0.299                       | 0.032 |
| ADAM15      | 45.681            | 94.893                      | 0.003 | MX1         | 34.052            | 67.566                      | 0.032 |
| ELL2        | 20.763            | 36.049                      | 0.003 | SPACA6      | 9.535             | 3.552                       | 0.032 |
| TBL2        | 6.737             | 8.79                        | 0.003 | TMEM191A    | 9.903             | 3.715                       | 0.032 |
| NTRK1       | 3.189             | 0.383                       | 0.003 | IL17C       | 1.619             | 0.452                       | 0.032 |
| E2F1        | 1.211             | 3.305                       | 0.003 | SAP25       | 61.858            | 28.442                      | 0.032 |
| SEMA6B      | 0.42              | 1.593                       | 0.003 | RNF39       | 0                 | 0.312                       | 0.032 |
| IGKV2D-24   | 0.209             | 2.868                       | 0.003 | RPE         | 12.168            | 17.507                      | 0.032 |
| JPH4        | 0.397             | 1.21                        | 0.003 | HLA-G       | 0.176             | 0.005                       | 0.032 |
| TNRC6C      | 15.345            | 3.93                        | 0.003 | PTDSS1      | 53.75             | 61.567                      | 0.032 |
| KRR1        | 45.348            | 21.942                      | 0.003 | AL353743.1  | 4.822             | 2.238                       | 0.032 |
| MGME1       | 9.01              | 14.124                      | 0.003 | CTIF        | 2.998             | 5.256                       | 0.032 |
| PRRT1B      | 0.975             | 0.102                       | 0.003 | RHOT1       | 23.433            | 32.263                      | 0.032 |
| UQCRH       | 143.823           | 210.997                     | 0.003 | AL357143.1  | 1.187             | 0.169                       | 0.032 |
| KIAA0895L   | 5.799             | 9.109                       | 0.003 | ENO2        | 28.431            | 9.791                       | 0.032 |
| DDOST       | 105.516           | 104.742                     | 0.003 | RORA        | 103.34            | 28.618                      | 0.032 |
| PGAM1       | 85.486            | 111.352                     | 0.003 | CPED1       | 3.449             | 8.962                       | 0.032 |
| PNRC1       | 378.634           | 162.562                     | 0.003 | YWHAE       | 69.647            | 115.835                     | 0.032 |
| CXXC4       | 0.384             | 0.026                       | 0.003 | EXT1        | 6.076             | 10.935                      | 0.033 |
| HSD17B4     | 31.723            | 58.572                      | 0.003 | ATP5MPL     | 95.029            | 103.5                       | 0.033 |
| HK1         | 49.394            | 81.197                      | 0.003 | KCTD14      | 0.208             | 0.492                       | 0.033 |
| COQ5        | 13.952            | 17.297                      | 0.003 | AC104763.3  | 2.45              | 0.409                       | 0.033 |
| KLF2        | 599.034           | 173.237                     | 0.003 | MYL6B       | 6.949             | 7.422                       | 0.033 |
|             |                   |                             |       | FAM47E-     |                   |                             |       |
| SLC30A4     | 5.694             | 2.527                       | 0.003 | STBD1       | 0.256             | 0.622                       | 0.033 |
| CES1P1      | 0.004             | 0.739                       | 0.003 | SOCS6       | 1.966             | 3.079                       | 0.033 |
| EPHB1       | 22.314            | 1.106                       | 0.003 | DDX6        | 83.726            | 44.194                      | 0.033 |
| VPS35L      | 19.892            | 25.82                       | 0.003 | STIM2       | 61.896            | 29.503                      | 0.033 |
| CALU        | 17.818            | 22.969                      | 0.003 | TUBGCP5     | 4.589             | 1.699                       | 0.033 |
| C3AR1       | 3.335             | 10.745                      | 0.003 | ADAM1B      | 0.854             | 0.186                       | 0.033 |
| HOXB2       | 13.769            | 6.465                       | 0.003 | PLEKHB2     | 29.778            | 34.337                      | 0.033 |
| CRISP3      | 1.006             | 0.2                         | 0.003 | P2RY1       | 0.575             | 1.774                       | 0.033 |
| C1orf162    | 102.715           | 224.181                     | 0.003 | GPR84       | 0.347             | 1.031                       | 0.033 |
| SPON1       | 2.768             | 0.903                       | 0.003 | C11orf24    | 9.049             | 12.509                      | 0.033 |
| MPND        | 10.694            | 13.632                      | 0.003 | NDUFA6      | 15.504            | 27.534                      | 0.033 |
| COMMD9      | 35.93             | 63.332                      | 0.003 | AC112484.2  | 1.241             | 3.948                       | 0.034 |
| SLC45A3     | 5.67              | 0.628                       | 0.003 | DNAJB1      | 116.717           | 40.368                      | 0.034 |
| MATK        | 77.043            | 16.698                      | 0.003 | KIT         | 0.698             | 0.145                       | 0.034 |
| H1FO        | 9.909             | 33.939                      | 0.003 | AC106865.1  | 1.214             | 2.948                       | 0.034 |
| TRGJP1      | 78.836            | 7.827                       | 0.003 | KRT23       | 6.696             | 0.921                       | 0.034 |
| GDI2        | 99.898            | 126.733                     | 0.003 | ANKRD18A    | 1.625             | 1.295                       | 0.034 |
| IGF2BP3     | 1.743             | 3.902                       | 0.003 | GPN3        | 4.166             | 7.042                       | 0.034 |
| NDUFA13     | 69.488            | 87.397                      | 0.003 | PROCR       | 5.246             | 2.261                       | 0.034 |
| TWF2        | 47.876            | 56.679                      | 0.003 | KIR3DX1     | 5.446             | 1.068                       | 0.034 |

**Table S1. Continuation**

| Gene Symbol | Base Mean Control | Base Mean COVID-19 patients | P adj | Gene Symbol | Base Mean Control | Base Mean COVID-19 patients | P adj |
|-------------|-------------------|-----------------------------|-------|-------------|-------------------|-----------------------------|-------|
| IGKV2D-28   | 0.28              | 71.721                      | 0.003 | MMP14       | 2.413             | 3.201                       | 0.034 |
| MND1        | 0.293             | 1.116                       | 0.003 | ETS2        | 25.099            | 67.033                      | 0.034 |
| HRH4        | 1.403             | 0.195                       | 0.003 | CCDC88A     | 28.576            | 48.18                       | 0.034 |
| ANXA5       | 101.406           | 224.399                     | 0.003 | GTF2IP23    | 2.025             | 6.189                       | 0.034 |
| ALDH3A2     | 18.55             | 24.114                      | 0.003 | HMGN1P10    | 1.223             | 0.102                       | 0.034 |
| KCNK13      | 0.273             | 0.979                       | 0.003 | JUND        | 463.916           | 200.73                      | 0.034 |
| MRPL3       | 25.466            | 28.196                      | 0.003 | CD38        | 6.685             | 25.665                      | 0.034 |
| BEGAIN      | 2.347             | 0.807                       | 0.003 | CLEC1B      | 10.306            | 33.515                      | 0.035 |
| LINC00854   | 19.652            | 41.502                      | 0.003 | CNNM3       | 30.756            | 14.777                      | 0.035 |
| ZDHHC11B    | 3.165             | 0.392                       | 0.003 | PITPNC1     | 50.067            | 20.709                      | 0.035 |
| ECH1        | 69.761            | 114.446                     | 0.003 | ALDH1L2     | 0.483             | 0.598                       | 0.035 |
| ANXA8L1     | 0.029             | 0.777                       | 0.003 | TNFSF8      | 16.341            | 19.892                      | 0.035 |
| HOXB3       | 10.988            | 5.203                       | 0.003 | FBP1        | 11.637            | 16.319                      | 0.035 |
| PLCD1       | 23.235            | 8.429                       | 0.003 | PTPA        | 38.384            | 42.71                       | 0.035 |
| AC078857.1  | 1.971             | 0.196                       | 0.003 | RIMBP3      | 0.446             | 0.08                        | 0.035 |
| LMO2        | 22.247            | 54.759                      | 0.003 | ERI2        | 6.005             | 6.545                       | 0.035 |
| KDELC1      | 0.134             | 0.421                       | 0.003 | AL031577.1  | 2.84              | 0.479                       | 0.035 |
| PTGS2       | 66.058            | 4.151                       | 0.003 | CEP170      | 22.719            | 30.262                      | 0.035 |
| IFI27L2     | 40.786            | 60.923                      | 0.003 | HK3         | 57.029            | 122.801                     | 0.035 |
| HLA-A       | 283.135           | 17.087                      | 0.003 | KIAA1522    | 0.89              | 1.193                       | 0.035 |
| SCIMP       | 17.151            | 34.046                      | 0.003 | LACC1       | 1.692             | 3.15                        | 0.035 |
| LMNB1       | 17.327            | 19.316                      | 0.003 | FGD6        | 4.068             | 5.01                        | 0.035 |
| ARHGGEF35   | 1.747             | 0.3                         | 0.003 | ARMT1       | 6.028             | 7.634                       | 0.035 |
| E2F2        | 2.67              | 7.784                       | 0.003 | SORD        | 4.763             | 6.558                       | 0.035 |
| CTSD        | 234.907           | 427.984                     | 0.003 | TRIM51      | 0.163             | 0                           | 0.035 |
| TRIM39      | 22.876            | 9.472                       | 0.003 | SERPING1    | 4.003             | 10.931                      | 0.035 |
| SRP54       | 26.486            | 29.87                       | 0.003 | FAM151B     | 11.451            | 12.453                      | 0.035 |
| HEXB        | 59.776            | 104.807                     | 0.004 | TULP2       | 3.619             | 7.144                       | 0.035 |
| RLN3        | 0.777             | 7.669                       | 0.004 | GCC2        | 50.415            | 21.497                      | 0.035 |
| AC006946.1  | 12.205            | 32.087                      | 0.004 | SRP9        | 108.226           | 136.964                     | 0.036 |
| ARVCF       | 6.95              | 2.737                       | 0.004 | DGKK        | 0.587             | 0.095                       | 0.036 |
| LRFN3       | 5.81              | 1.297                       | 0.004 | ALAS1       | 11.302            | 14.839                      | 0.036 |
| DPYD        | 33.376            | 76.908                      | 0.004 | PCTP        | 7.717             | 10.805                      | 0.036 |
| REELD1      | 2.119             | 0.555                       | 0.004 | ATP13A1     | 37.156            | 38.663                      | 0.036 |
| STS         | 1.434             | 5.291                       | 0.004 | LAIR1       | 3.535             | 18.31                       | 0.036 |
| ZFHX3       | 65.082            | 3.863                       | 0.004 | EXT2        | 13.548            | 13.674                      | 0.036 |
| PDIA2       | 0.71              | 0.051                       | 0.004 | NPC2        | 170.525           | 293.144                     | 0.036 |
| TK2         | 11.102            | 17.28                       | 0.004 | AGRN        | 2.9               | 4.434                       | 0.036 |
| PRR9        | 0.803             | 0.007                       | 0.004 | EIF4EBP1    | 13.433            | 21.584                      | 0.036 |
| VAMP2       | 168.588           | 72.954                      | 0.004 | JADE3       | 0.324             | 0.823                       | 0.036 |
| LCNL1       | 2.253             | 0.479                       | 0.004 | FTL         | 2485.724          | 4783.853                    | 0.036 |
| CASS4       | 8.154             | 2.478                       | 0.004 | CCDC92      | 16.127            | 6.387                       | 0.036 |
| LDLR        | 31.93             | 35.572                      | 0.004 | GPX1P1      | 1.577             | 3.944                       | 0.036 |
| HNRNPAB     | 47.163            | 59.19                       | 0.004 | EBLN2       | 4.459             | 6.332                       | 0.036 |
| KIAA0408    | 0.684             | 0.164                       | 0.004 | ITGAM       | 212.245           | 311.026                     | 0.036 |
| AAR2        | 9.432             | 10.412                      | 0.004 | VIM         | 1093.554          | 1476.11                     | 0.036 |
| CCL4        | 27.86             | 3.586                       | 0.004 | COX7B       | 59.263            | 89.934                      | 0.036 |
| SGCD        | 0.806             | 0.105                       | 0.004 | RAB34       | 16.059            | 23.842                      | 0.036 |
| HIGD2A      | 122.006           | 180.4                       | 0.004 | BACE1       | 5.887             | 8.765                       | 0.036 |
| RPS3AP6     | 3.531             | 0.307                       | 0.004 | ORAI3       | 8.247             | 11.989                      | 0.036 |
| SNX29       | 11.588            | 12.193                      | 0.004 | CATSPERG    | 9.068             | 3.137                       | 0.036 |
| UCHL1       | 0.026             | 1.001                       | 0.004 | GRN         | 194.128           | 419.154                     | 0.036 |



**Table S1. Continuation**

| Gene Symbol | Base Mean Control | Base Mean COVID-19 patients | P adj | Gene Symbol | Base Mean Control | Base Mean COVID-19 patients | P adj |
|-------------|-------------------|-----------------------------|-------|-------------|-------------------|-----------------------------|-------|
| CPSF3       | 11.988            | 16.525                      | 0.004 | PRR16       | 0.219             | 0.906                       | 0.036 |
| EIF6        | 34.47             | 43.237                      | 0.004 | HKDC1       | 1.226             | 0.287                       | 0.036 |
| AJM1        | 6.103             | 1.68                        | 0.004 | PRDX4       | 7.996             | 14.76                       | 0.036 |
| MAPK6       | 13.272            | 16.082                      | 0.004 | CPM         | 9.755             | 18.16                       | 0.036 |
| RNF17       | 0.156             | 0.003                       | 0.004 | CLIC1       | 222.498           | 334.734                     | 0.036 |
| IGKV5-2     | 1.348             | 19.388                      | 0.004 | H2AFZP6     | 3.547             | 0.79                        | 0.036 |
| IGLC3       | 42.664            | 560.804                     | 0.004 | GPAT2P1     | 0.014             | 0.469                       | 0.036 |
| NME1        | 8.265             | 16.526                      | 0.004 | TPMT        | 5.62              | 6.384                       | 0.036 |
| POU3F3      | 0.567             | 0.02                        | 0.004 | CMPK2       | 7.158             | 17.798                      | 0.036 |
| EPB41L4A    | 6.388             | 1.85                        | 0.004 | FAR2P1      | 0.823             | 0.356                       | 0.036 |
| VAR2        | 3.407             | 6.233                       | 0.004 | PHF1        | 107.777           | 42.509                      | 0.036 |
| ANKRD12     | 56.695            | 24.303                      | 0.004 | CFAP45      | 9.474             | 1.435                       | 0.036 |
| FAM109B     | 1.946             | 2.037                       | 0.004 | SLC2A4RG    | 56.601            | 24.489                      | 0.036 |
| MRPS36      | 5.263             | 0.164                       | 0.004 | RUFY4       | 2.896             | 5.888                       | 0.037 |
| TMCC2       | 3.19              | 48.408                      | 0.004 | SNX32       | 1.099             | 1.741                       | 0.037 |
| LILRA4      | 2.25              | 0.147                       | 0.004 | VENTX       | 4.912             | 12.756                      | 0.037 |
| FEZF2       | 1.101             | 0.011                       | 0.004 | DNAJC24     | 15.851            | 7.707                       | 0.037 |
| TFCP2       | 15.428            | 20.222                      | 0.004 | TOMM40L     | 8.369             | 9.915                       | 0.037 |
| CTSZ        | 148.109           | 321.021                     | 0.004 | ARSB        | 6.453             | 9.835                       | 0.037 |
| HNRNPF      | 59.524            | 78.316                      | 0.004 | RIOX1       | 7.216             | 2.958                       | 0.037 |
| RNASE3      | 1.582             | 10.361                      | 0.004 | IGHV1-3     | 13.116            | 94.901                      | 0.037 |
| GDF11       | 3.468             | 0.986                       | 0.004 | PPP1R8      | 10.176            | 11.864                      | 0.037 |
| STBD1       | 0.217             | 0.786                       | 0.004 | PAK1IP1     | 3.854             | 5.122                       | 0.037 |
| GRHPR       | 25.922            | 42.402                      | 0.004 | DRAM1       | 23.835            | 28.713                      | 0.037 |
| CPE         | 0.031             | 0.546                       | 0.004 | DYNLT3      | 15.891            | 7.753                       | 0.037 |
| AC008758.1  | 0.453             | 0.02                        | 0.004 | CLCF1       | 8.125             | 2.585                       | 0.037 |
| DEFA3       | 72.895            | 7.326                       | 0.004 | JDP2        | 18.775            | 61.934                      | 0.037 |
| CHIC1       | 5.647             | 1.813                       | 0.004 | TMEM182     | 29.862            | 14.691                      | 0.037 |
| STT3A       | 25.271            | 37.133                      | 0.004 | COA4        | 20.529            | 23.081                      | 0.037 |
| JAKMIP2     | 2.745             | 0.596                       | 0.004 | TXNRD2      | 17.128            | 22.922                      | 0.037 |
| KCTD5       | 10.468            | 12.493                      | 0.004 | RALGDS      | 84.272            | 35.884                      | 0.037 |
| AD000671.2  | 2.583             | 3.338                       | 0.004 | TRBJ1-5     | 195.696           | 36.098                      | 0.038 |
| HCCS        | 6.36              | 10.399                      | 0.004 | MCTS1       | 22.695            | 23.847                      | 0.038 |
| WASF1       | 0.786             | 2.089                       | 0.004 | DNAJB9      | 32.574            | 17.99                       | 0.038 |
| ALDOA       | 384.349           | 519.075                     | 0.004 | IRF8        | 85.626            | 172.041                     | 0.038 |
| ALDH9A1     | 20.265            | 23.741                      | 0.004 | BHLHA15     | 0.563             | 3.368                       | 0.038 |
| DARS2       | 3.83              | 3.35                        | 0.004 | PDK4        | 3.225             | 10.412                      | 0.038 |
| IGHJ4       | 136.47            | 554.778                     | 0.004 | PLIN2       | 28.284            | 48.23                       | 0.038 |
| ANGPTL6     | 4.737             | 0.939                       | 0.004 | PLCB3       | 5.353             | 7.23                        | 0.038 |
| SMIM34B     | 0.423             | 2.888                       | 0.004 | AL355355.2  | 5.19              | 1.076                       | 0.038 |
| NRIP1       | 7.761             | 13.552                      | 0.004 | OAS2        | 28.177            | 49.409                      | 0.038 |
| SORT1       | 10.793            | 18.17                       | 0.004 | FBXO43      | 0.102             | 0.261                       | 0.038 |
| C5orf30     | 1.65              | 8.15                        | 0.004 | TMEM117     | 2.054             | 0.584                       | 0.038 |
| AKAP5       | 1.972             | 0.591                       | 0.004 | BBX         | 23.837            | 11.448                      | 0.038 |
| ZHX2        | 9.92              | 4.484                       | 0.004 | CYB5R1      | 22.854            | 31.645                      | 0.038 |
| CLCN4       | 1.024             | 1.713                       | 0.004 | PMVK        | 12.62             | 15.957                      | 0.038 |
| FAM234A     | 16.167            | 20.25                       | 0.004 | GYG1        | 26.781            | 41.827                      | 0.038 |
| TTC4P1      | 0.939             | 0.15                        | 0.004 | PSMD1       | 22.323            | 29.403                      | 0.039 |
| RMI1        | 1.484             | 2.583                       | 0.004 | ONECUT1     | 0.459             | 0.036                       | 0.039 |
| POLE4       | 37.462            | 40.708                      | 0.004 | SMARCAL1    | 9.874             | 10.862                      | 0.039 |
| IGHV3-74    | 3.903             | 44.727                      | 0.004 | LHFPL5      | 7.127             | 2.142                       | 0.039 |
| ITM2A       | 74.348            | 18.227                      | 0.004 | LBH         | 68.169            | 26.193                      | 0.039 |

**Table S1. Continuation**

| Gene Symbol | Base Mean Control | Base Mean COVID-19 patients | P adj | Gene Symbol | Base Mean Control | Base Mean COVID-19 patients | P adj |
|-------------|-------------------|-----------------------------|-------|-------------|-------------------|-----------------------------|-------|
| SLC1A5      | 12.187            | 28.395                      | 0.005 | SMCO4       | 14.397            | 37.554                      | 0.039 |
| TSHZ2       | 3.682             | 0.527                       | 0.005 | AC006030.1  | 0.762             | 0.293                       | 0.039 |
| TRIM7       | 2.445             | 7.65                        | 0.005 | EOMES       | 5.852             | 2.35                        | 0.039 |
| KIR2DL1     | 3.442             | 0.113                       | 0.005 | SVIP        | 19.685            | 8.049                       | 0.039 |
| ENPP3       | 1.572             | 0.195                       | 0.005 | ADGRL1      | 30.153            | 18.38                       | 0.039 |
| IFI44       | 57.256            | 167.689                     | 0.005 | RFX8        | 0.336             | 0.062                       | 0.039 |
| NBPF13P     | 0.472             | 0.048                       | 0.005 | MCM4        | 12.638            | 17.614                      | 0.039 |
| DESI1       | 18.577            | 22.572                      | 0.005 | KIR3DL1     | 0.36              | 0                           | 0.039 |
| LGALS1      | 243.178           | 452.653                     | 0.005 | LONRF3      | 4.543             | 8.234                       | 0.039 |
| GKAP1       | 8.246             | 2.915                       | 0.005 | GM2A        | 21.56             | 40.733                      | 0.039 |
| CDC42BPB    | 7.244             | 10.991                      | 0.005 | CCSAP       | 9.234             | 4.158                       | 0.04  |
| PKNOX2      | 0.556             | 0.014                       | 0.005 | NUDT19P5    | 0.283             | 0.999                       | 0.04  |
| DERA        | 13.254            | 20.339                      | 0.005 | PRDM11      | 3.362             | 1.697                       | 0.04  |
| FADS1       | 6.374             | 10.136                      | 0.005 | G6PD        | 64.627            | 91.468                      | 0.04  |
| PSMD2       | 117.591           | 114.664                     | 0.005 | AL031736.2  | 0.406             | 0.013                       | 0.04  |
| COX15       | 13.616            | 16.129                      | 0.005 | FAM156B     | 2.138             | 0.539                       | 0.04  |
| UNC13B      | 0.353             | 0.763                       | 0.005 | HLA-H       | 0                 | 0.614                       | 0.04  |
| SHMT2       | 25.552            | 37.246                      | 0.005 | RSF1        | 46.423            | 20.474                      | 0.04  |
| HLA-A       | 7.632             | 337.878                     | 0.005 | AC002996.1  | 3.97              | 16.355                      | 0.04  |
| BMPR1A      | 2.948             | 1.257                       | 0.005 | CCL4L2      | 4.561             | 0.472                       | 0.04  |
| PDIA6       | 43.504            | 58.92                       | 0.005 | MRGBP       | 4.41              | 4.958                       | 0.04  |
| WNT5B       | 0.236             | 1.088                       | 0.005 | SPATA5      | 3.051             | 1.451                       | 0.04  |
| DDX41       | 40.655            | 50.54                       | 0.005 | MEIS2       | 3.305             | 0.301                       | 0.04  |
| MT-ND6      | 3148.22           | 612.393                     | 0.005 | TMEM116     | 11.79             | 5.626                       | 0.04  |
| SIGIRR      | 264.446           | 80.466                      | 0.005 | KLF12       | 26.32             | 8.302                       | 0.04  |
| SNX8        | 8.105             | 15.579                      | 0.005 | FBXL8       | 9.513             | 11.154                      | 0.04  |
| IGLJ3       | 0.678             | 27.478                      | 0.005 | TGFBR1      | 28.923            | 14.116                      | 0.04  |
| PTGDS       | 143.08            | 34.489                      | 0.005 | APCDD1      | 1.089             | 1.301                       | 0.04  |
| PER3        | 5.999             | 1.831                       | 0.005 | QSER1       | 4.637             | 5.947                       | 0.04  |
| HCG4B       | 0.058             | 0.808                       | 0.005 | FBXO6       | 11.234            | 14.265                      | 0.04  |
| UTP11       | 7.458             | 11.762                      | 0.005 | ASB13       | 3.943             | 5.574                       | 0.04  |
| C5orf15     | 22.214            | 28.556                      | 0.005 | AC015818.6  | 1.017             | 0.059                       | 0.04  |
| SMARCD3     | 29.497            | 57.841                      | 0.005 | GINS2       | 0.79              | 1.381                       | 0.04  |
| MED8        | 8.489             | 11.939                      | 0.005 | HIVEP2      | 16.289            | 8.9                         | 0.04  |
| C6orf48     | 26.449            | 4.088                       | 0.005 | SPON2       | 193.129           | 65.34                       | 0.04  |
| LPCAT1      | 79.516            | 25.72                       | 0.005 | AHDC1       | 11.052            | 6.015                       | 0.041 |
| PSMB1       | 74.524            | 91.178                      | 0.005 | EIF4A1      | 524.811           | 705.051                     | 0.041 |
| CRIP2       | 17.778            | 2.504                       | 0.005 | ZNF292      | 26.416            | 14.4                        | 0.041 |
| TSHZ1       | 10.968            | 3.936                       | 0.005 | MRPL47      | 13.408            | 16.048                      | 0.041 |
| BTBD9       | 10.058            | 4.26                        | 0.005 | RACGAP1     | 3.584             | 5.696                       | 0.041 |
| LLGL2       | 57.761            | 18.119                      | 0.005 | SLC9A9      | 8.362             | 13.074                      | 0.041 |
| CA11        | 9.439             | 3.314                       | 0.005 | OR7E13P     | 0.516             | 0.071                       | 0.041 |
| SLC25A6     | 223.089           | 288.022                     | 0.005 | OXTR        | 1.714             | 0.641                       | 0.041 |
| CH25H       | 0.041             | 0.672                       | 0.005 | NFIA        | 2.231             | 6.24                        | 0.041 |
| KIF14       | 0.199             | 0.404                       | 0.005 | CRLF1       | 7.95              | 2.827                       | 0.041 |
| TMEM69      | 9.363             | 11.656                      | 0.005 | TBC1D8      | 25.396            | 34.679                      | 0.041 |
| OGFR        | 41.743            | 49.532                      | 0.005 | RBP7        | 24.17             | 80.843                      | 0.041 |
| COL18A1     | 26.26             | 5.701                       | 0.005 | NCEH1       | 3.19              | 4.688                       | 0.041 |
| TMEM121B    | 0.851             | 3.115                       | 0.005 | EDEM2       | 19.738            | 23.104                      | 0.041 |
| GSTM5       | 0.177             | 0.007                       | 0.005 | EML4        | 48.739            | 20.151                      | 0.041 |
| RPL34P20    | 8.498             | 2.085                       | 0.005 | RHAG        | 0.658             | 2.491                       | 0.041 |
| MYH11       | 11.057            | 4.075                       | 0.005 | AC243837.2  | 0.479             | 0.079                       | 0.041 |

**Table S1. Continuation**

| Gene Symbol | Base Mean Control | Base Mean COVID-19 patients | P adj | Gene Symbol | Base Mean Control | Base Mean COVID-19 patients | P adj |
|-------------|-------------------|-----------------------------|-------|-------------|-------------------|-----------------------------|-------|
| PACS1       | 103.197           | 44.99                       | 0.005 | GBE1        | 5.869             | 8.02                        | 0.041 |
| HGF         | 2.853             | 8.417                       | 0.005 | GPR153      | 2.065             | 0.596                       | 0.041 |
| LRP2BP      | 1.669             | 0.647                       | 0.005 | CMTM4       | 2.565             | 5.493                       | 0.042 |
| FZD2        | 0.727             | 2.384                       | 0.006 | KCNE3       | 12.721            | 28.999                      | 0.042 |
| CRYBG2      | 5.891             | 1.809                       | 0.006 | TMEM254     | 9.252             | 11.113                      | 0.042 |
| TRIM71      | 0.117             | 0.583                       | 0.006 | PSMC1       | 58.415            | 70.294                      | 0.042 |
| KDELR2      | 28.944            | 31.701                      | 0.006 | XIRP2       | 0.031             | 0.372                       | 0.042 |
| IKBKE       | 18.922            | 22.025                      | 0.006 | EREG        | 16.773            | 53.128                      | 0.042 |
| MIOS        | 14.875            | 17.84                       | 0.006 | PPM1N       | 5.79              | 2.212                       | 0.042 |
| RBBP8P1     | 0.999             | 0.144                       | 0.006 | CXorf57     | 6.757             | 2.48                        | 0.042 |
| DRAXIN      | 1.612             | 0.579                       | 0.006 | SUMO3       | 47.734            | 52.876                      | 0.042 |
| BZW2        | 12.577            | 18.706                      | 0.006 | AC090971.3  | 4.954             | 1.407                       | 0.042 |
| SLFN11      | 24.863            | 41.85                       | 0.006 | STX12       | 31.088            | 40.342                      | 0.042 |
| NOL4L       | 43.293            | 15.23                       | 0.006 | COL8A2      | 1.104             | 2.157                       | 0.042 |
| POLR2E      | 79.737            | 101.96                      | 0.006 | ODF2L       | 57.547            | 25.663                      | 0.042 |
| TMEM173     | 64.587            | 80.849                      | 0.006 | ATP6AP1     | 51.354            | 73.64                       | 0.042 |
| CXCL14      | 2.323             | 0.028                       | 0.006 | ALPK2       | 0.886             | 0.094                       | 0.042 |
| UST         | 3.013             | 0.867                       | 0.006 | CARNS1      | 12.659            | 3.63                        | 0.042 |
| CMTM7       | 30.595            | 41.204                      | 0.006 | MUC16       | 0.18              | 0.02                        | 0.043 |
| POP7        | 9.209             | 11.503                      | 0.006 | ETF1P1      | 0.239             | 0                           | 0.043 |
| GSR         | 23.297            | 41.3                        | 0.006 | TTC16       | 11.845            | 2.92                        | 0.043 |
| SDHB        | 48.225            | 57.97                       | 0.006 | MTND2P40    | 0.606             | 0.085                       | 0.043 |
| EVI2A       | 50.776            | 62.914                      | 0.006 | DBH         | 1.278             | 0.272                       | 0.043 |
| NUDT16      | 12.73             | 29.268                      | 0.006 | UBE2E2      | 9.867             | 13.763                      | 0.043 |
| GARS        | 49.94             | 48.802                      | 0.006 | SPHK1       | 3.519             | 9.114                       | 0.043 |
| WDR61       | 21.817            | 25.198                      | 0.006 | SGSM1       | 2.049             | 0.748                       | 0.043 |
| NDUFB3      | 25.358            | 29.819                      | 0.006 | FNDC11      | 1.07              | 0.35                        | 0.043 |
| TDRD9       | 3.255             | 10.991                      | 0.006 | HLA-DRB6    | 0.32              | 1.06                        | 0.043 |
| RPN2        | 73.483            | 90.558                      | 0.006 | METTL9      | 5.505             | 13.425                      | 0.043 |
| TUBGCP2     | 40.013            | 42.068                      | 0.006 | SNX1        | 131.746           | 150.679                     | 0.043 |
| TIMM13      | 13.822            | 21.105                      | 0.006 | HASPIN      | 0.188             | 0.552                       | 0.043 |
| OR2A4       | 0.241             | 0                           | 0.006 | KBTBD4      | 17.931            | 8.41                        | 0.043 |
| SH2D4A      | 1.148             | 2.909                       | 0.006 | TIMP2       | 21.547            | 42.454                      | 0.043 |
| CMAS        | 12.513            | 17.472                      | 0.006 | GNAL        | 3.811             | 1.087                       | 0.043 |
| ZNF91       | 13.069            | 5.095                       | 0.006 | PDHA1P1     | 0.984             | 0.083                       | 0.043 |
| NEBL        | 2.729             | 0.693                       | 0.006 | MIER2       | 8.314             | 11.706                      | 0.043 |
| SDHC        | 43.285            | 72.799                      | 0.006 | GRIK1       | 0.347             | 0.644                       | 0.043 |
| ZNF329      | 4.447             | 1.712                       | 0.006 | CCT4P2      | 0.36              | 0.017                       | 0.043 |
| CCL4        | 25.815            | 8.335                       | 0.006 | DIAPH2      | 6.27              | 8.856                       | 0.043 |
| FAAHP1      | 10.435            | 2.428                       | 0.006 | MRPL19      | 9.328             | 9.837                       | 0.043 |
| ADA2        | 74.372            | 123.827                     | 0.006 | MPHOSPH8    | 69.07             | 27.187                      | 0.044 |
| PPP2R2B     | 18.129            | 5.119                       | 0.006 | PGM2L1      | 3.613             | 0.81                        | 0.044 |
| SOWAHD      | 0.905             | 2.014                       | 0.006 | ARL6        | 2.63              | 1.235                       | 0.044 |
| PYHIN1      | 54.839            | 17.235                      | 0.006 | EXOSC1      | 20.63             | 23.142                      | 0.044 |
| SPTLC2      | 25.981            | 43.429                      | 0.006 | SAT2        | 39.386            | 49.501                      | 0.044 |
| CALCRL      | 1.882             | 3.355                       | 0.006 | TMX2        | 28.267            | 30.47                       | 0.044 |
| MCEMP1      | 12.24             | 40.696                      | 0.006 | CDT1        | 1.316             | 2.149                       | 0.044 |
| ACLY        | 25.836            | 29.298                      | 0.006 | ASPRV1      | 2.26              | 0.532                       | 0.044 |
| TJP3        | 4.437             | 1.983                       | 0.006 | ANO10       | 9.899             | 12.377                      | 0.044 |
| COASY       | 29.283            | 33.25                       | 0.006 | TMEM258     | 73.239            | 98.162                      | 0.044 |
| BFAR        | 20.812            | 25.016                      | 0.006 | PRSS22      | 0.507             | 0.018                       | 0.044 |
| KRT2        | 0.301             | 0.04                        | 0.006 | AL592183.1  | 32.828            | 8.682                       | 0.044 |

**Table S1. Continuation**

| Gene Symbol | Base Mean Control | Base Mean COVID-19 patients | P adj | Gene Symbol | Base Mean Control | Base Mean COVID-19 patients | P adj |
|-------------|-------------------|-----------------------------|-------|-------------|-------------------|-----------------------------|-------|
| HLA-B       | 55.045            | 182.106                     | 0.006 | PCLAF       | 6.251             | 13.307                      | 0.044 |
| TAS2R20     | 0                 | 0.219                       | 0.006 | DAP         | 32.338            | 40.018                      | 0.045 |
| SLITRK4     | 0.568             | 2.32                        | 0.006 | UGGT2       | 5.597             | 5.647                       | 0.045 |
| AP1B1       | 32.959            | 47.971                      | 0.007 | IGLV3-22    | 0                 | 2.695                       | 0.045 |
| GART        | 20.996            | 20.762                      | 0.007 | SUMF1       | 12.658            | 15.219                      | 0.045 |
| RPEP4       | 2.534             | 0.092                       | 0.007 | IQCN        | 9.807             | 3.502                       | 0.045 |
| SMKR1       | 2.454             | 0.631                       | 0.007 | TMEM230     | 53.009            | 57.88                       | 0.045 |
| IGKV2-29    | 2.07              | 16.288                      | 0.007 | RBMS1P1     | 5.558             | 18.123                      | 0.045 |
| TRBJ2-3     | 372.604           | 66.935                      | 0.007 | SELENOM     | 15.788            | 4.596                       | 0.045 |
| AC020898.1  | 2.392             | 0.145                       | 0.007 | AMER2       | 0.219             | 0.05                        | 0.045 |
| ARPC1A      | 25.564            | 28.205                      | 0.007 | ZNF44       | 25.391            | 13.29                       | 0.045 |
| CLDN7       | 2.419             | 4.183                       | 0.007 | AL590240.2  | 2.065             | 0.483                       | 0.045 |
| MYO16       | 0.418             | 0.086                       | 0.007 | BTK         | 46.436            | 78.362                      | 0.045 |
| TEX2        | 6.428             | 15.075                      | 0.007 | MOAP1       | 44.03             | 20.156                      | 0.045 |
| RPS6KC1     | 6.411             | 8.525                       | 0.007 | C1orf226    | 0.082             | 0.321                       | 0.045 |
| MARCH1      | 19.423            | 53.287                      | 0.007 | RCBTB2      | 25.076            | 32.275                      | 0.045 |
| PRRT4       | 0.323             | 2.845                       | 0.007 | FCAR        | 4.774             | 5.331                       | 0.045 |
| GHITM       | 66.651            | 81.496                      | 0.007 | GABRR2      | 1.635             | 3.268                       | 0.046 |
| PHEX        | 0.316             | 0.064                       | 0.007 | ZNF345      | 12.595            | 4.864                       | 0.046 |
| TRIM74      | 2.878             | 0.93                        | 0.007 | CRYBB2P1    | 18.586            | 9.727                       | 0.046 |
| MARCH9      | 23.29             | 7.948                       | 0.007 | GCNT4       | 1.718             | 0.496                       | 0.046 |
| IQGAP3      | 0.067             | 0.198                       | 0.007 | NAGPA       | 27.509            | 26.947                      | 0.046 |
| TXN2        | 31.442            | 34.894                      | 0.007 | PRPF4       | 7.601             | 8.165                       | 0.046 |
| C1orf115    | 0.494             | 2.04                        | 0.007 | NDUF4F4P4   | 2.668             | 0.384                       | 0.046 |
| NUP93       | 29.544            | 33.083                      | 0.007 | SHTN1       | 8.509             | 21.841                      | 0.046 |
| NSUN2       | 46.925            | 51.014                      | 0.007 | SCAI        | 6.286             | 2.915                       | 0.046 |
| SEPT10      | 1.143             | 3.16                        | 0.007 | CS          | 88.851            | 84.766                      | 0.046 |
| ADPRH       | 2.576             | 6.036                       | 0.007 | MRPL53P1    | 8.15              | 1.303                       | 0.046 |
| PPEF2       | 18.137            | 4.676                       | 0.007 | CWF19L2     | 10.539            | 3.175                       | 0.046 |
| TRGC1       | 15.372            | 3.031                       | 0.007 | NAIP        | 13.423            | 28.444                      | 0.046 |
| KIF3A       | 6.031             | 1.443                       | 0.007 | MAP1B       | 0.224             | 0.07                        | 0.046 |
| DDB1        | 55.059            | 45.626                      | 0.007 | IL10RB      | 32.095            | 38.547                      | 0.046 |
| KIR2DP1     | 0.388             | 0.015                       | 0.007 | AOC1        | 1.353             | 0.321                       | 0.046 |
| C5          | 3.338             | 6.353                       | 0.007 | IL4         | 0.957             | 0                           | 0.047 |
| KNL1        | 0.569             | 1.014                       | 0.007 | IFNGR1      | 51.321            | 101.731                     | 0.047 |
| SUCLA2      | 15.245            | 14.086                      | 0.007 | CYBB        | 98.326            | 196.249                     | 0.047 |
| TIMP1       | 70.25             | 121.722                     | 0.007 | SCFD1       | 42.343            | 45.772                      | 0.047 |
| WARS2       | 2.911             | 3.031                       | 0.007 | FAM20A      | 1.696             | 2.968                       | 0.047 |
| KIAA1958    | 1.68              | 4.79                        | 0.007 | AL096701.2  | 3.503             | 0                           | 0.047 |
| TMEM150B    | 12.228            | 46.292                      | 0.007 | GOT2        | 13.56             | 15.84                       | 0.047 |
| CORO2B      | 0.333             | 0.77                        | 0.007 | CPNE2       | 13.705            | 23.025                      | 0.047 |
| AC017035.1  | 1.748             | 0.212                       | 0.007 | PROSER1     | 28.323            | 31.65                       | 0.047 |
| FAH         | 8.808             | 21.528                      | 0.007 | ZNF529      | 13.691            | 6.464                       | 0.047 |
| PADI2       | 7.464             | 17.468                      | 0.008 | SEC24D      | 12.452            | 17.167                      | 0.047 |
| IGHV4-55    | 0.682             | 9.98                        | 0.008 | CD68        | 130.736           | 268.543                     | 0.047 |
| KCNN3       | 0.078             | 0.487                       | 0.008 | AC104763.1  | 3.636             | 0.479                       | 0.047 |
| C19orf84    | 6.059             | 0.828                       | 0.008 | IL17RA      | 45.103            | 75.107                      | 0.047 |
| SLC16A8     | 0.44              | 3.123                       | 0.008 | HMGB3       | 5.439             | 9.062                       | 0.047 |
| ANTXR1      | 5.821             | 0.25                        | 0.008 | PPP1R16B    | 29.341            | 10.082                      | 0.048 |
| MPV17L2     | 3.833             | 5.425                       | 0.008 | ATP6VOD1    | 65.045            | 91.574                      | 0.048 |
| NSG1        | 41.262            | 27.873                      | 0.008 | DPYSL4      | 0.789             | 0.201                       | 0.048 |
| MARVELD1    | 4.32              | 18.56                       | 0.008 | CLIC4       | 7.713             | 15.468                      | 0.048 |

**Table S1. Continuation**

| Gene Symbol | Base Mean Control | Base Mean COVID-19 patients | P adj | Gene Symbol | Base Mean Control | Base Mean COVID-19 patients | P adj |
|-------------|-------------------|-----------------------------|-------|-------------|-------------------|-----------------------------|-------|
| ERO1B       | 11.726            | 5.103                       | 0.008 | FAM200B     | 29.246            | 48.526                      | 0.048 |
| TICRR       | 0.252             | 0.49                        | 0.008 | TFEC        | 11.722            | 34.824                      | 0.048 |
| GCNT1       | 4.828             | 11.085                      | 0.008 | SMIM4       | 7.353             | 14.255                      | 0.048 |
| HNRNPA3P2   | 2.51              | 0.235                       | 0.008 | DTHD1       | 12.877            | 3.439                       | 0.048 |
| ARHGAP31    | 3.648             | 8.127                       | 0.008 | OPA1        | 23.513            | 25.584                      | 0.048 |
| FAM166A     | 0.263             | 1.483                       | 0.008 | IGLV1-44    | 11.165            | 123.721                     | 0.048 |
| PLEKHG3     | 63.605            | 16.051                      | 0.008 | PTK7        | 4.433             | 2.048                       | 0.048 |
| CMTM2       | 68.733            | 7.212                       | 0.008 | PICK1       | 17.74             | 32.778                      | 0.048 |
| PUDP        | 5.745             | 10.609                      | 0.008 | KY          | 2.667             | 0.207                       | 0.048 |
| USP6NL      | 5.259             | 7.261                       | 0.008 | IGHV3-69-1  | 0.48              | 2.642                       | 0.048 |
| ADAM22      | 2.151             | 0.385                       | 0.008 | SBDS        | 156.426           | 72.205                      | 0.048 |
| METTL7A     | 11.038            | 38.223                      | 0.008 | CAMK1D      | 20.492            | 7.93                        | 0.048 |
| OSTC        | 31.802            | 47.543                      | 0.008 | NUTF2       | 36.857            | 41.806                      | 0.048 |
| ALG1        | 6.367             | 7.63                        | 0.008 | AL163636.2  | 0.915             | 5.605                       | 0.048 |
| UQCRC2      | 108.334           | 117.058                     | 0.008 | CYP19A1     | 0.011             | 1.221                       | 0.048 |
| AL356320.2  | 3.316             | 0.33                        | 0.008 | ATP5MG      | 150.517           | 189.556                     | 0.048 |
| TKFC        | 17.621            | 27.15                       | 0.008 | MED20       | 5.688             | 6.447                       | 0.048 |
| MME         | 39.966            | 4.179                       | 0.008 | ARL8B       | 30.356            | 33.002                      | 0.048 |
| IGKV3-7     | 0.041             | 3.105                       | 0.008 | TUFM        | 89.008            | 90.815                      | 0.048 |
| SRGAP2B     | 5.543             | 15.488                      | 0.008 | AC106047.2  | 1.471             | 0.243                       | 0.048 |
| RNF181      | 42.282            | 72.321                      | 0.008 | B3GLCT      | 2.108             | 0.908                       | 0.048 |
| IFNG        | 25.981            | 4.965                       | 0.008 | MIP         | 0.284             | 0.044                       | 0.048 |
| RBM48       | 12.325            | 5.399                       | 0.008 | ZNF853      | 1.503             | 0.481                       | 0.049 |
| F5          | 8.11              | 15.101                      | 0.008 | PEX10       | 4.499             | 4.099                       | 0.049 |
| CCDC80      | 1.779             | 0.784                       | 0.008 | EMC7        | 36.99             | 38.81                       | 0.049 |
| MT1F        | 6.112             | 10.604                      | 0.008 | TRAPPC11    | 21.405            | 24.702                      | 0.049 |
| MCMBP       | 18.853            | 24.304                      | 0.008 | MITF        | 7.712             | 6.499                       | 0.049 |
| LGALS3      | 73.794            | 166.636                     | 0.008 | CLEC3B      | 1.993             | 5.215                       | 0.049 |
| ADORA3      | 0.282             | 2.098                       | 0.008 | KANSL1      | 64.89             | 27.175                      | 0.049 |
| SNX17       | 56.921            | 62.939                      | 0.008 | EIF2B1      | 24.814            | 28.612                      | 0.049 |
| PER1        | 340.602           | 520.418                     | 0.008 | KL          | 0.066             | 0.345                       | 0.049 |
| MYDGF       | 36.893            | 58.834                      | 0.008 | CSGALNACT2  | 38.802            | 65.106                      | 0.049 |
| PSMA5       | 36.451            | 43.639                      | 0.008 | APP         | 40.954            | 59.233                      | 0.049 |
| SOCS7       | 4.726             | 4.505                       | 0.008 | CFP         | 104.818           | 205.473                     | 0.049 |
| EFHC2       | 2.656             | 0.78                        | 0.008 | MYBPC1      | 0.055             | 0.201                       | 0.049 |
|             |                   |                             |       | LRRC37A17P  | 1.809             | 0.752                       | 0.049 |
|             |                   |                             |       | CLEC2D      | 158.124           | 74.485                      | 0.049 |
|             |                   |                             |       | FAM173B     | 4.731             | 5.023                       | 0.049 |
