# Supplementary material for: Aripiprazole as a Candidate Treatment of COVID-19 Identified Through Genomic Analysis
Source: PubMed Central journal article supplement (PMC7982825; doi:10.3389/fphar.2021.646701), 2021-03-02
Supplement: datasheet2.pdf [file datasheet2.pdf]

**Table S2. Differential expression between schizophrenia patients before and after medication with aripiprazole**

| Gene Symbol | Base Mean schizophrenia patients (SP) before medication | Base Mean schizophrenia patients after medication | P adj  | Gene Symbol | Base Mean schizophrenia patients (SP) after medication | Base Mean schizophrenia patients (SP) after medication | P adj  |
|-------------|---------------------------------------------------------|---------------------------------------------------|--------|-------------|--------------------------------------------------------|--------------------------------------------------------|--------|
| LMO4        | 32.086                                                  | 28.082                                            | 0.0039 | RAB11FIP3   | 27.883                                                 | 31.405                                                 | 0.0304 |
| ABCA9       | 0.458                                                   | 0.420                                             | 0.0039 | ZCCHC14     | 29.577                                                 | 32.640                                                 | 0.0304 |
| FCN1        | 1397.628                                                | 1161.781                                          | 0.0073 | MCF2L       | 8.184                                                  | 9.280                                                  | 0.0304 |
| PRRT3       | 4.883                                                   | 5.154                                             | 0.0094 | PCGF1       | 10.550                                                 | 10.087                                                 | 0.0311 |
| HLA-DMA     | 91.751                                                  | 82.563                                            | 0.0094 | ANKRD55     | 8.395                                                  | 9.249                                                  | 0.0312 |
| PRKCQ-AS1   | 31.743                                                  | 35.265                                            | 0.0094 | CEP250      | 83.042                                                 | 88.669                                                 | 0.0312 |
| ZNF764      | 11.469                                                  | 12.098                                            | 0.0094 | DNAJB1      | 95.632                                                 | 95.076                                                 | 0.0320 |
| COMMD3      | 7.459                                                   | 7.207                                             | 0.0094 | MIF         | 0.328                                                  | 0.426                                                  | 0.0320 |
| ARPIN       | 20.399                                                  | 19.217                                            | 0.0094 | WDR41       | 24.401                                                 | 22.339                                                 | 0.0320 |
| STAC3       | 13.315                                                  | 10.680                                            | 0.0094 | ETFDH       | 15.687                                                 | 15.005                                                 | 0.0320 |
| HNMT        | 22.273                                                  | 17.993                                            | 0.0094 | PLEKHA1     | 50.519                                                 | 54.384                                                 | 0.0320 |
| SOCS2       | 9.135                                                   | 10.027                                            | 0.0094 | ZBTB14      | 33.525                                                 | 34.835                                                 | 0.0320 |
| SPOCK1      | 1.546                                                   | 1.263                                             | 0.0094 | EPPK1       | 3.470                                                  | 4.345                                                  | 0.0320 |
| RIN2        | 24.220                                                  | 20.029                                            | 0.0094 | UBQLN4      | 35.236                                                 | 36.537                                                 | 0.0320 |
| CD1D        | 59.113                                                  | 53.443                                            | 0.0094 | RRP8        | 22.255                                                 | 22.686                                                 | 0.0323 |
| TRIM35      | 27.517                                                  | 28.405                                            | 0.0094 | MKRN2OS     | 0.235                                                  | 0.328                                                  | 0.0323 |
| DSC1        | 3.079                                                   | 3.172                                             | 0.0094 | PRRC2B      | 236.734                                                | 261.113                                                | 0.0323 |
| PRLR        | 2.221                                                   | 2.174                                             | 0.0094 | TMEM144     | 7.538                                                  | 7.473                                                  | 0.0323 |
| ABCA3       | 8.610                                                   | 9.750                                             | 0.0094 | RHOQ        | 74.320                                                 | 69.436                                                 | 0.0324 |
| ZG16        | 0.064                                                   | 0.032                                             | 0.0094 | HAS3        | 2.022                                                  | 2.271                                                  | 0.0324 |
| DCTN1       | 108.969                                                 | 108.604                                           | 0.0094 | C19orf57    | 0.673                                                  | 0.776                                                  | 0.0325 |
| UQCRHL      | 4.020                                                   | 3.572                                             | 0.0094 | MIF-AS1     | 0.940                                                  | 1.047                                                  | 0.0325 |
| RAC1        | 154.654                                                 | 132.773                                           | 0.0094 | ABCB8       | 26.044                                                 | 28.738                                                 | 0.0325 |
| LILRB4      | 39.652                                                  | 31.243                                            | 0.0094 | MIR4697HG   | 10.834                                                 | 13.118                                                 | 0.0325 |
| FZD2        | 7.317                                                   | 6.006                                             | 0.0100 | FREM3       | 0.072                                                  | 0.068                                                  | 0.0325 |
| HLA-DMB     | 102.561                                                 | 96.806                                            | 0.0100 | NAP1L3      | 3.828                                                  | 3.851                                                  | 0.0325 |
| IBA57       | 12.737                                                  | 13.993                                            | 0.0100 | IL15        | 11.389                                                 | 10.781                                                 | 0.0325 |
| LIMCH1      | 0.466                                                   | 0.332                                             | 0.0100 | TRBJ1-3     | 2.271                                                  | 2.901                                                  | 0.0328 |
| P3H4        | 2.795                                                   | 3.052                                             | 0.0100 | SLA2        | 44.158                                                 | 46.380                                                 | 0.0331 |
| SEC22C      | 41.216                                                  | 42.242                                            | 0.0100 | TRBV6-6     | 2.812                                                  | 2.970                                                  | 0.0331 |
| TRIM65      | 32.324                                                  | 33.836                                            | 0.0100 | NPTN        | 94.358                                                 | 87.113                                                 | 0.0331 |
| GORASP1     | 42.270                                                  | 41.405                                            | 0.0100 | TIMP2       | 168.603                                                | 148.720                                                | 0.0331 |
| CNTLN       | 4.831                                                   | 4.059                                             | 0.0100 | MYH9        | 2548.612                                               | 2573.745                                               | 0.0331 |
| ATOH8       | 2.278                                                   | 1.990                                             | 0.0100 | VEGFA       | 16.502                                                 | 17.879                                                 | 0.0331 |
| CACNA2D3    | 7.943                                                   | 6.666                                             | 0.0100 | TRBJ1-1     | 0.563                                                  | 0.714                                                  | 0.0337 |
| ADGRD1      | 7.112                                                   | 7.220                                             | 0.0100 | CRHBP       | 0.807                                                  | 0.855                                                  | 0.0342 |
| S100Z       | 5.794                                                   | 5.202                                             | 0.0100 | SLC25A38    | 34.794                                                 | 35.604                                                 | 0.0342 |
| MS4A6A      | 212.501                                                 | 180.645                                           | 0.0101 | UVRAG       | 41.878                                                 | 39.284                                                 | 0.0342 |
| TMEM218     | 14.404                                                  | 13.954                                            | 0.0101 | GPN2        | 29.167                                                 | 29.971                                                 | 0.0346 |
| MORC4       | 7.822                                                   | 7.935                                             | 0.0107 | CTSF        | 9.285                                                  | 10.028                                                 | 0.0347 |

Table S2. continuation

| Gene Symbol | Base Mean SP<br>before med. | Base Mean SP<br>after med. | P adj  | Gene Symbol | Base Mean SP<br>before med. | Base Mean SP<br>after med. | P adj  |
|-------------|-----------------------------|----------------------------|--------|-------------|-----------------------------|----------------------------|--------|
| HEXA        | 15.827                      | 15.709                     | 0.0110 | FBXO31      | 19.502                      | 20.290                     | 0.0347 |
| LY86        | 37.086                      | 27.581                     | 0.0110 | GATA3       | 34.863                      | 36.700                     | 0.0347 |
| PLEKHO1     | 167.311                     | 160.997                    | 0.0110 | POU6F1      | 17.843                      | 20.187                     | 0.0347 |
| LRIG1       | 26.677                      | 29.588                     | 0.0110 | GRIN3B      | 2.572                       | 2.970                      | 0.0351 |
| HFE         | 11.334                      | 10.160                     | 0.0110 | CRELD1      | 19.873                      | 21.536                     | 0.0352 |
| TMEM106A    | 11.230                      | 10.499                     | 0.0110 | GDF15       | 0.143                       | 0.142                      | 0.0356 |
| SCNM1       | 33.147                      | 30.427                     | 0.0110 | METTL8      | 13.655                      | 13.701                     | 0.0357 |
| DCLK2       | 0.604                       | 0.587                      | 0.0110 | THOP1       | 15.767                      | 16.461                     | 0.0357 |
| PSRC1       | 6.968                       | 6.826                      | 0.0110 | IRAK1BP1    | 2.512                       | 2.869                      | 0.0357 |
| NAGK        | 233.370                     | 229.076                    | 0.0110 | ZNF662      | 2.166                       | 2.608                      | 0.0359 |
| PLXNA1      | 15.086                      | 16.187                     | 0.0110 | ATG7        | 40.809                      | 37.131                     | 0.0360 |
| IL18        | 8.428                       | 7.262                      | 0.0110 | HVCN1       | 51.901                      | 48.300                     | 0.0361 |
| POM121C     | 84.068                      | 87.629                     | 0.0111 | GINM1       | 22.296                      | 20.054                     | 0.0368 |
| PCNT        | 62.176                      | 65.912                     | 0.0119 | CATSPER1    | 4.939                       | 3.989                      | 0.0373 |
| LOXL3       | 11.364                      | 10.757                     | 0.0120 | PPIF        | 67.630                      | 67.024                     | 0.0373 |
| MUC4        | 0.400                       | 0.493                      | 0.0121 | TICAM2      | 0.086                       | 0.100                      | 0.0373 |
| RBMS2       | 18.831                      | 17.822                     | 0.0121 | CACNA2D4    | 15.046                      | 14.328                     | 0.0376 |
| NEGR1       | 1.656                       | 1.409                      | 0.0123 | HEG1        | 37.917                      | 39.251                     | 0.0376 |
| CXorf21     | 35.249                      | 30.904                     | 0.0124 | ACVRL1      | 1.796                       | 1.388                      | 0.0376 |
| RASSF4      | 78.206                      | 74.793                     | 0.0124 | MMP28       | 2.094                       | 2.317                      | 0.0381 |
| DDT         | 0.357                       | 0.318                      | 0.0124 | NAP1L2      | 5.324                       | 5.331                      | 0.0384 |
| DEFA6       | 0.041                       | 0.028                      | 0.0124 | SYK         | 315.816                     | 286.552                    | 0.0384 |
| MFS2A       | 5.252                       | 5.118                      | 0.0125 | UBE2E2      | 11.989                      | 9.902                      | 0.0384 |
| SMCO4       | 16.864                      | 13.905                     | 0.0125 | LINC01257   | 0.004                       | 0.002                      | 0.0391 |
| DEFA5       | 0.035                       | 0.024                      | 0.0132 | FOXP3       | 9.069                       | 10.833                     | 0.0394 |
| BTN2A2      | 30.211                      | 30.233                     | 0.0140 | DECR1       | 64.052                      | 58.874                     | 0.0397 |
| MMP19       | 0.960                       | 0.809                      | 0.0140 | HHEX        | 57.354                      | 48.435                     | 0.0397 |
| HS3ST3B1    | 24.161                      | 25.358                     | 0.0140 | SOCS2-AS1   | 1.080                       | 1.321                      | 0.0397 |
| TMEM150B    | 10.122                      | 9.003                      | 0.0143 | CD33        | 69.518                      | 64.967                     | 0.0402 |
| PABPC3      | 0.572                       | 0.556                      | 0.0143 | DAPP1       | 129.732                     | 120.248                    | 0.0402 |
| ZC3H12C     | 3.894                       | 3.620                      | 0.0144 | SLC2A9      | 9.859                       | 8.894                      | 0.0402 |
| FAM114A1    | 3.256                       | 2.634                      | 0.0146 | SLAIN1      | 13.737                      | 13.872                     | 0.0403 |
| CD209       | 1.585                       | 1.465                      | 0.0146 | PRRC2A      | 412.227                     | 423.040                    | 0.0407 |
| ELANE       | 4.578                       | 5.686                      | 0.0155 | ERI2        | 3.442                       | 3.428                      | 0.0407 |
| DEFA4       | 8.418                       | 10.398                     | 0.0159 | MAP3K9      | 8.981                       | 10.108                     | 0.0409 |
| CRY1        | 17.082                      | 17.956                     | 0.0159 | AIFM3       | 5.548                       | 5.118                      | 0.0409 |
| LSS         | 35.234                      | 39.567                     | 0.0159 | ZNF540      | 7.184                       | 7.704                      | 0.0409 |
| CD1C        | 16.577                      | 13.710                     | 0.0159 | GSN         | 4.162                       | 3.917                      | 0.0409 |
| KCNK13      | 2.067                       | 1.680                      | 0.0159 | TSHZ2       | 8.984                       | 9.583                      | 0.0411 |
| C3orf18     | 8.830                       | 9.927                      | 0.0159 | HK3         | 238.465                     | 220.824                    | 0.0412 |
| VENTX       | 20.269                      | 19.125                     | 0.0159 | NLRC3       | 114.280                     | 130.972                    | 0.0418 |
| CD5         | 145.681                     | 158.734                    | 0.0159 | FSCN1       | 6.859                       | 5.858                      | 0.0418 |
| CSTA        | 52.358                      | 39.948                     | 0.0163 | SYT15       | 0.430                       | 0.427                      | 0.0418 |

Table S2. continuation

| Gene Symbol | Base Mean SP<br>before med. | Base Mean SP<br>after med. | P adj  | Gene Symbol | Base Mean SP<br>before med. | Base Mean SP<br>after med. | P adj  |
|-------------|-----------------------------|----------------------------|--------|-------------|-----------------------------|----------------------------|--------|
| DUSP22      | 92.569                      | 89.484                     | 0.0165 | SULT1A2     | 1.906                       | 1.896                      | 0.0418 |
| SERPINB8    | 33.849                      | 28.946                     | 0.0165 | DMRTC2      | 0.574                       | 0.537                      | 0.0418 |
| PORCN       | 11.163                      | 11.876                     | 0.0166 | TUB         | 1.704                       | 2.217                      | 0.0419 |
| ARL10       | 13.595                      | 15.078                     | 0.0166 | ZSWIM5      | 2.890                       | 3.253                      | 0.0424 |
| ZNF74       | 11.277                      | 12.353                     | 0.0166 | SLC6A19     | 0.091                       | 0.124                      | 0.0427 |
| SNX30       | 71.328                      | 68.251                     | 0.0166 | ATP6V0E2    | 23.716                      | 25.220                     | 0.0428 |
| SYNE2       | 325.571                     | 376.095                    | 0.0166 | URGCP       | 20.728                      | 22.007                     | 0.0428 |
| FXYD3       | 0.060                       | 0.028                      | 0.0166 | CREG1       | 79.074                      | 66.197                     | 0.0428 |
| SMARCD3     | 28.463                      | 26.363                     | 0.0166 | TBC1D25     | 28.801                      | 30.253                     | 0.0428 |
| ACOT2       | 6.989                       | 6.965                      | 0.0166 | SIGLECL1    | 0.089                       | 0.098                      | 0.0428 |
| SOX4        | 15.660                      | 13.030                     | 0.0166 | IGFLR1      | 4.980                       | 5.291                      | 0.0432 |
| THNSL1      | 6.760                       | 6.773                      | 0.0166 | CD36        | 228.442                     | 186.978                    | 0.0432 |
| SESN3       | 151.768                     | 160.200                    | 0.0169 | TYMP        | 256.419                     | 240.394                    | 0.0432 |
| ST6GALNAC6  | 37.751                      | 41.613                     | 0.0170 | DIS3L2      | 19.860                      | 21.025                     | 0.0435 |
| LMO2        | 56.784                      | 45.114                     | 0.0175 | ZNF503-AS2  | 0.295                       | 0.240                      | 0.0439 |
| NECTIN4     | 0.082                       | 0.084                      | 0.0175 | ZBTB47      | 10.560                      | 9.796                      | 0.0439 |
| TRBV24-1    | 2.195                       | 2.354                      | 0.0176 | SMIM10L2A   | 1.460                       | 1.747                      | 0.0439 |
| SLC27A1     | 24.356                      | 23.014                     | 0.0181 | DIAPH1      | 502.983                     | 495.157                    | 0.0439 |
| REG3A       | 0.017                       | 0.009                      | 0.0183 | TDP1        | 25.452                      | 25.620                     | 0.0439 |
| ODF2        | 34.993                      | 35.675                     | 0.0184 | OXNAD1      | 45.381                      | 51.064                     | 0.0439 |
| HLA-DQB1    | 155.718                     | 136.808                    | 0.0184 | METRNL      | 3.656                       | 3.976                      | 0.0439 |
| HSPB8       | 0.023                       | 0.009                      | 0.0184 | CDX1        | 0.007                       | 0.006                      | 0.0439 |
| APOA4       | 0.125                       | 0.028                      | 0.0189 | SESTD1      | 29.783                      | 27.904                     | 0.0440 |
| TMEM30B     | 3.039                       | 3.405                      | 0.0191 | ETHE1       | 9.315                       | 8.213                      | 0.0441 |
| MPO         | 15.539                      | 18.985                     | 0.0191 | CCDC88C     | 211.430                     | 228.795                    | 0.0441 |
| FUOM        | 4.920                       | 4.034                      | 0.0191 | CA11        | 5.406                       | 5.534                      | 0.0450 |
| NCAPD2      | 89.280                      | 90.487                     | 0.0191 | REG1A       | 0.036                       | 0.023                      | 0.0450 |
| ITPRIPL2    | 17.633                      | 15.745                     | 0.0191 | JOSD1       | 57.704                      | 59.401                     | 0.0450 |
| KCTD3       | 6.901                       | 5.865                      | 0.0191 | ST3GAL6     | 24.577                      | 22.171                     | 0.0456 |
| RNF130      | 237.899                     | 202.855                    | 0.0203 | PRDX3       | 78.875                      | 69.012                     | 0.0456 |
| WAC-AS1     | 31.920                      | 28.569                     | 0.0203 | TMEM205     | 6.600                       | 5.962                      | 0.0463 |
| PACS1       | 306.906                     | 319.453                    | 0.0203 | SOWAHD      | 10.636                      | 9.375                      | 0.0463 |
| LPAR1       | 6.921                       | 6.248                      | 0.0207 | C9orf47     | 1.032                       | 0.931                      | 0.0463 |
| AP1S2       | 156.667                     | 134.202                    | 0.0207 | FUT2        | 0.669                       | 0.690                      | 0.0463 |
| KLHDC4      | 58.116                      | 67.823                     | 0.0207 | ANOS1       | 0.230                       | 0.207                      | 0.0463 |
| HGF         | 10.642                      | 8.899                      | 0.0207 | C17orf97    | 0.737                       | 0.713                      | 0.0463 |
| HAAO        | 5.326                       | 4.842                      | 0.0209 | ITK         | 219.626                     | 241.973                    | 0.0463 |
| SLC29A2     | 5.538                       | 6.174                      | 0.0210 | POMGNT2     | 6.469                       | 6.390                      | 0.0463 |
| ANKRD46     | 13.676                      | 13.275                     | 0.0216 | LTA         | 7.584                       | 7.984                      | 0.0463 |
| KIF5A       | 0.965                       | 1.155                      | 0.0216 | ADAM9       | 29.477                      | 24.003                     | 0.0463 |
| PREX2       | 0.040                       | 0.044                      | 0.0216 | PCOLCE2     | 0.256                       | 0.317                      | 0.0463 |
| IDH1        | 43.647                      | 37.553                     | 0.0216 | STAT4       | 51.194                      | 54.324                     | 0.0463 |
| KCNK6       | 43.497                      | 42.374                     | 0.0216 | TMEM44-AS1  | 1.701                       | 1.641                      | 0.0463 |
| SCPEP1      | 129.147                     | 112.695                    | 0.0216 | PLA2G4A     | 6.966                       | 5.735                      | 0.0463 |
| PIGR        | 0.338                       | 0.216                      | 0.0217 | SEC16A      | 187.700                     | 196.074                    | 0.0463 |

Table S2. continuation

| Gene Symbol | Base Mean SP<br>before med. | Base Mean SP<br>after med. | P adj  | Gene Symbol | Base Mean SP<br>before med. | Base Mean SP<br>after med. | P adj  |
|-------------|-----------------------------|----------------------------|--------|-------------|-----------------------------|----------------------------|--------|
| FOLR2       | 3.965                       | 3.287                      | 0.0217 | SLC44A3     | 0.315                       | 0.289                      | 0.0463 |
| FAM169A     | 6.976                       | 7.711                      | 0.0219 | NLRP3       | 48.828                      | 42.188                     | 0.0463 |
| MUC2        | 0.140                       | 0.057                      | 0.0220 | INAFM2      | 12.923                      | 11.596                     | 0.0463 |
| APOB        | 0.070                       | 0.028                      | 0.0222 | LARP7       | 31.546                      | 29.017                     | 0.0468 |
| TKTL2       | 0.057                       | 0.059                      | 0.0222 | MFSD1       | 128.547                     | 112.907                    | 0.0468 |
| OSBPL1A     | 11.526                      | 10.631                     | 0.0222 | FABP1       | 0.093                       | 0.031                      | 0.0472 |
| ITFG1       | 29.749                      | 26.379                     | 0.0234 | CACNA1A     | 2.349                       | 2.109                      | 0.0472 |
| SLC35B1     | 22.682                      | 21.435                     | 0.0234 | CEP164      | 45.181                      | 48.135                     | 0.0472 |
| ZNF253      | 11.584                      | 12.088                     | 0.0234 | NDUFA9      | 6.255                       | 6.223                      | 0.0472 |
| PTPN4       | 92.680                      | 102.509                    | 0.0234 | ALDH1A1     | 30.859                      | 28.158                     | 0.0473 |
| ADAP2       | 15.894                      | 13.009                     | 0.0234 | PCYT2       | 15.338                      | 15.874                     | 0.0473 |
| BICDL1      | 28.958                      | 32.467                     | 0.0234 | SELPLG      | 691.509                     | 663.024                    | 0.0481 |
| ZNF605      | 14.191                      | 14.984                     | 0.0234 | CDC42BPG    | 8.706                       | 9.682                      | 0.0481 |
| OOSP1       | 0.090                       | 0.089                      | 0.0234 | FGD1        | 5.298                       | 5.435                      | 0.0481 |
| GALNT11     | 26.439                      | 27.040                     | 0.0234 | TRBV7-2     | 10.028                      | 10.280                     | 0.0481 |
| TMTC2       | 12.803                      | 12.145                     | 0.0234 | ZFAND5      | 209.605                     | 187.483                    | 0.0481 |
| GRIK5       | 0.842                       | 0.961                      | 0.0234 | DACH1       | 4.499                       | 4.619                      | 0.0481 |
| RNASE3      | 3.636                       | 3.978                      | 0.0234 | PRR12       | 86.912                      | 91.874                     | 0.0481 |
| TAF6        | 22.898                      | 23.604                     | 0.0235 | C1orf162    | 122.185                     | 107.481                    | 0.0481 |
| FCHSD2      | 86.882                      | 82.373                     | 0.0235 | CCDC102A    | 7.734                       | 7.803                      | 0.0481 |
| TIGIT       | 34.527                      | 37.712                     | 0.0236 | HPCAL4      | 8.985                       | 9.611                      | 0.0481 |
| MGST1       | 13.846                      | 10.642                     | 0.0236 | DLG4        | 18.816                      | 17.104                     | 0.0481 |
| DNAH3       | 0.352                       | 0.386                      | 0.0236 | PHRF1       | 78.633                      | 82.196                     | 0.0481 |
| TMEM105     | 0.126                       | 0.116                      | 0.0238 | RTN4        | 202.661                     | 177.860                    | 0.0481 |
| SNX31       | 0.008                       | 0.007                      | 0.0238 | AZU1        | 5.584                       | 6.858                      | 0.0482 |
| FBXW4       | 35.133                      | 36.821                     | 0.0238 | LTA4H       | 308.529                     | 268.144                    | 0.0482 |
| CCDC120     | 8.167                       | 8.962                      | 0.0238 | SCIMP       | 55.445                      | 48.479                     | 0.0482 |
| DGKE        | 23.170                      | 26.385                     | 0.0238 | FGD6        | 14.422                      | 13.029                     | 0.0482 |
| HEXB        | 103.561                     | 89.552                     | 0.0238 | SLC43A3     | 16.013                      | 14.203                     | 0.0482 |
| CTSG        | 2.741                       | 3.349                      | 0.0238 | NREP        | 8.431                       | 7.348                      | 0.0485 |
| EXOC1       | 60.568                      | 58.185                     | 0.0238 | JPH2        | 0.004                       | 0.006                      | 0.0487 |
| AGFG2       | 23.771                      | 26.118                     | 0.0238 | SEMA5A      | 1.576                       | 1.520                      | 0.0492 |
| DEFA3       | 39.095                      | 41.979                     | 0.0238 | NFATC2      | 111.994                     | 122.139                    | 0.0492 |
| KMO         | 6.715                       | 5.893                      | 0.0238 | SEMA4F      | 7.335                       | 8.218                      | 0.0492 |
| SH2D3A      | 16.928                      | 18.056                     | 0.0238 | AFMID       | 5.581                       | 5.121                      | 0.0492 |
| ADH1C       | 0.012                       | 0.005                      | 0.0238 | FAM234B     | 5.543                       | 5.402                      | 0.0492 |
| UGGT2       | 3.326                       | 2.945                      | 0.0238 | GATA6       | 0.197                       | 0.246                      | 0.0492 |
| ATP8B2      | 199.796                     | 220.306                    | 0.0238 | MYCL        | 36.146                      | 32.007                     | 0.0492 |
| MS4A4E      | 4.467                       | 4.517                      | 0.0241 | FN3K        | 1.948                       | 2.045                      | 0.0492 |
| ARHGEF10L   | 30.471                      | 28.160                     | 0.0241 | ZNF276      | 68.897                      | 76.671                     | 0.0492 |
| P2RY11      | 4.815                       | 5.502                      | 0.0246 | WWC1        | 0.800                       | 0.817                      | 0.0492 |
| TFEC        | 43.094                      | 38.676                     | 0.0246 | C22orf39    | 32.830                      | 33.728                     | 0.0492 |
| PDGFRL      | 0.025                       | 0.023                      | 0.0249 | KIAA1210    | 0.009                       | 0.004                      | 0.0492 |
| ZNF697      | 5.603                       | 4.916                      | 0.0249 | ST3GAL1     | 172.949                     | 181.783                    | 0.0492 |
| FXYD6       | 2.689                       | 2.248                      | 0.0249 | SPTSSB      | 2.627                       | 3.174                      | 0.0492 |

Table S2. continuation

| Gene Symbol | Base Mean SP<br>before med. | Base Mean SP<br>after med. | P adj  | Gene Symbol | Base Mean SP<br>before med. | Base Mean SP<br>after med. | P adj  |
|-------------|-----------------------------|----------------------------|--------|-------------|-----------------------------|----------------------------|--------|
| MTMR11      | 25.581                      | 23.881                     | 0.0251 | GZMM        | 39.665                      | 40.225                     | 0.0492 |
| PNMA5       | 0.466                       | 0.478                      | 0.0252 | CLCA1       | 0.071                       | 0.054                      | 0.0492 |
| ZNF30       | 4.557                       | 4.711                      | 0.0252 | GTF3C1      | 88.094                      | 91.030                     | 0.0492 |
| CAD         | 55.617                      | 60.443                     | 0.0252 | CMIP        | 157.473                     | 150.515                    | 0.0492 |
| LRRK1       | 43.587                      | 43.364                     | 0.0260 | KLHL25      | 4.913                       | 5.518                      | 0.0492 |
| TTC21A      | 7.321                       | 7.562                      | 0.0271 | PLPP1       | 2.493                       | 2.593                      | 0.0492 |
| TMEM25      | 7.147                       | 7.883                      | 0.0275 | CLDN3       | 0.023                       | 0.012                      | 0.0492 |
| LRFN3       | 9.267                       | 9.868                      | 0.0284 | SLC24A4     | 64.710                      | 60.743                     | 0.0492 |
| RUSC2       | 12.058                      | 10.621                     | 0.0287 | EXPH5       | 2.137                       | 2.437                      | 0.0492 |
| BTK         | 111.373                     | 100.543                    | 0.0287 | FUCA2       | 16.961                      | 14.433                     | 0.0492 |
| ANKRD63     | 0.026                       | 0.033                      | 0.0292 | C10orf55    | 0.042                       | 0.037                      | 0.0496 |
| STK38L      | 80.869                      | 74.721                     | 0.0295 | TMTC1       | 8.613                       | 7.983                      | 0.0497 |
| UBA3        | 65.395                      | 61.933                     | 0.0295 | PTPRE       | 299.062                     | 290.136                    | 0.0497 |
| MID2        | 3.703                       | 4.154                      | 0.0298 | EMILIN2     | 157.085                     | 131.873                    | 0.0498 |
| PPP1R13B    | 13.116                      | 14.169                     | 0.0300 | PCED1B      | 57.908                      | 65.122                     | 0.0499 |
|             |                             |                            |        | SF3B2       | 247.067                     | 239.019                    | 0.0499 |
